# Supplementary material
Source: PubMed Central journal article supplement (PMC3692395)
Supplement: NIHMS485606-supplement-1_si_001.pdf [file NIHMS485606-supplement-1_si_001.pdf]

2

3 Automated assignments of N- and O-site specific  
4 glycosylation with extensive glycan heterogeneity of  
5 glycoprotein mixtures

6

7 John S. Strum<sup>1</sup>, Charles C. Nwosu<sup>1</sup>, Serenus Hua<sup>1,2</sup>, Scott R. Kronewitter<sup>1</sup>, Richard R. Seipert<sup>1</sup>, Robert J.  
8 Bachelor<sup>1</sup>, Hyun Joo An<sup>2</sup>, and Carlito B. Lebrilla<sup>\*,1,3</sup>

9

10

- 11 1. Department of Chemistry, University of California, Davis, CA 95616, USA.  
12 2. Graduate School of Analytical Science and Technology, Chungnam National University, Daejeon, South Korea.  
13 3. Department of Biochemistry and Molecular Medicine, University of California, Davis, CA 95616, USA.

14

15

16 \* To whom correspondence should be addressed:

17 Carlito B. Lebrilla, Email address: [cblebrilla@ucdavis.edu](mailto:cblebrilla@ucdavis.edu); Tel: +1-530-752-0504; Fax: +1-530-  
18 752-8995

19

20 Keywords: Glycoproteomics, site-specific glycosylation, tandem mass spectrometry, false-discovery rate,  
21 target-decoy approach

22

23

1 Organization of Supplemental Materials

2 Pg. 3-6 Discussion: GP Finder Algorithms, Inputs, and Limitations

3 Pg. 7-25 Figures referenced in the Paper (S-1 through S-19)

4 Pg. 26-51 Figures referenced in the Supplemental Materials (S-20 through S-29)

5 Pg. 52-62 Tables referenced in the Paper (S-1 through S-4)

6 Pg. 63 Table referenced in the Supplemental Materials (S-5)

7

## 1 Additional Details of the GP Finder Algorithms

2           The software analyzes tandem MS data in two distinct phases: identification of potential  
3 glycopeptides according to accurate precursor mass and scoring of competing matches for each precursor  
4 mass according to tandem MS fragmentation. The first phase is straight forward. All possible peptide  
5 components are calculated with the algorithm in **Figure S-20** using the user-provided protein sequences  
6 and the maximum experimental mass. The list of theoretical peptides is then used in the algorithm in  
7 **Figure S-21** to determine the list of potential glycans present in the sample by subtracting from each  
8 experimental mass the mass of each theoretical peptide (generating residual glycan masses).  
9 Concurrently, a list of theoretical glycans of specific glycan compositions is generated in the algorithm in  
10 **Figure S-22** based on the user-defined parameters of the minimum and maximum numbers of each of the  
11 possible monosaccharides. The final part of the first phase is found in the algorithm in **Figure S-23**,  
12 where the list of residual glycan masses is compared to the list of the theoretical glycans according to the  
13 user-defined mass tolerance. All resulting matches are then further analyzed in the second phase  
14 according to their tandem mass spectra. Prior to scoring the tandem MS data, GP Finder uses the  
15 algorithm in **Figure S-24** to eliminate tandem MS peak matches that do not follow certain biological  
16 rules. This filter simplifies the data analysis by removing many random matches. A similar filter is also  
17 used to eliminate false assignments in the first phase, however, here it eliminates unlikely fragments  
18 rather than unlikely intact glycopeptide compositions. Representative examples in **Figure S-5, S-6 and S-**  
19 **26** show the logic behind some of the rules. The acceptable peak matches are scored by the algorithm in  
20 **Figure S-25**, which is described in the manuscript by **Eq. 1** through **4** in the Methods section.

## 21 Input Parameters for GP Finder

22           The input protein sequences are UniProt Flat Files. All other parameters were left at the default  
23 settings (although they can be specified by the user). The output file is Excel. The results can also be  
24 viewed through the program's user-interface. The theoretical glycopeptides were bounded within 20 ppm

1 of the empirical neutral masses (after mass deconvolution). N- and O-linked theoretical matches were  
2 generated separately. N-linked matches were limited to the following monosaccharide compositions: 3-9  
3 Hexose, 2-7 HexNAc, 0-5 deoxyhexose, and 0-4 NeuAc. The O-linked matches were limited to 0-4  
4 Hexose, 1-4 HexNAc, 0-3 deoxyhexose, and 0-3 NeuAc. Results were filtered through the previously  
5 published retrosynthetic N-linked library. The tandem data was bounded within 80 ppm of the empirical  
6 neutral masses. A set of rules was used to eliminate matches to fragments in the tandem data that are  
7 unlikely to be real. The pseudocode for the elimination rules is included in **Figure S-24**. The respective  
8 unit-less weights for scoring of the tandem MS fragment types were 5, 5, 4, 3, 2, 1. Additional  
9 parameters can be set, such as ignoring data with low absolute or relative abundance or augmenting the  
10 score based on extensive chains or ladders of monosaccharide mass differences, however these filters  
11 were not applied here.

12 The software can handle CID data as a CSV file independent of the instrument type. The  
13 spectra must be saved in the following format where the key header information includes the  
14 retention time, deconvoluted mass-to-charge ratio, and product ion charge state:

15  
16 # Product Ion (*retention time* min) *ionization type* *fragmentation type* (*deconvoluted precursor mass-to-charge*  
17 *ratio*[*z=charge state*] -> \*\*)  
18 #Point,X(Thompsons),Y(Counts)  
19 *line number,deconvoluted product ion mass-to-charge ratio,abundance*  
20

21 Some example data in this format that has been shortened in length is shown below:

22  
23 # Product Ion (20.575 min) ESI CID (1026.9301[*z=2*] -> \*\*)  
24 #Point,X(Thompsons),Y(Counts)  
25 0,203.0868,36.16447449  
26 1,273.0794,17.00735283  
27 2,291.1014,20.04166603  
28 3,365.119,113.6859741  
29 # Product Ion (20.629 min) ESI CID (723.2941[*z=2*] -> \*\*)  
30 #Point,X(Thompsons),Y(Counts)  
31 0,203.0918,20.55681801  
32 1,273.0777,251.6022797  
33 2,291.0978,186.9583282  
34 3,324.0412,12  
35

1 The algorithm can technically be used for ETD but it has not yet been tested with these data and  
2 we make no claim that it does work with such data.

### 3 Discussion of Limitations

4 The algorithm is based on the strategy used by Nwosu but is more comprehensive in its  
5 consideration of evidence, more blind to “expected” results, and is quantitative in respect to its  
6 comparison of competing matches. The algorithm does not use glycan self-consistency because the pool  
7 of possible glycans is quite large and homogenous (producing extensive glycan families among false  
8 matches). A human analyst may see trends that distinguish one set of glycans from another, but the  
9 software will consider a much larger pool of glycan families that randomly match because of both the  
10 large masses of the theoretical glycans and the similar combinations as a result of having only a few  
11 unique monomers. Peptide self-consistency is less susceptible to this problem.

12 Truly unbiased TDA assumes that the entire span of the decoy and false target distributions are  
13 identical. We set the average target and decoy boosts to be the same but do not establish that the entire  
14 distribution is the same. Consider a potential scenario where the initial false target and decoy scores are  
15 in the range 10–18 and the subsequent target boost is 20 points for 50% of the false target matches while  
16 the decoy boost is never more than 10 points. The decoy matches do not score more than 28; however,  
17 potentially 50% of the false target matches could be boosted higher than 20 points (or lower, but that is an  
18 issue of disguising true matches as false ones). As such, whatever percentage is boosted higher than the  
19 average will appear to have an FDR of zero.

20 TDA is particularly useful for analyzing sets of data files with vastly different quality and content.  
21 Such flexibility is afforded by the decoy distribution that is tailored to each dataset. TDA-based FDR is  
22 not unlike internal standards used in quantitative chemistry with interfering matrices. Even when the  
23 target matches are poor and the target scores completely overlap with the decoy scores, the method

1 reliably reveals poor target data and has helped us rapidly seek out and find the underlying problems  
2 behind target datasets (such as discovering poor S/N or inadequate peak intensity thresholding).

3 The algorithm can accommodate data from any enzyme; however, the software does not change its  
4 algorithm based on the enzyme and does not accommodate variable modifications of amino acids. The  
5 algorithm filters data effectively without relying on data-reduction through the use of a specific enzyme.

6 The paucity of both correct and incorrect assignments for each tandem spectrum can be problematic  
7 for making per spectrum statistical inferences. Sufficient false assignments are required if one is to model  
8 the incorrect distribution for a single spectrum and assign a likelihood such as the E-value that the top  
9 score is not a component of the population of random false assignments.

10 A histogram of all the scores for matches to a single spectrum shows a top match that is separated  
11 from the lower matches (**Figure S-27** and **S-28**). The lower matches are characteristic of random  
12 (incorrect) matches whereas the top match is unique with less than a 10% likelihood of belonging to the  
13 random score distribution; however, the results for this type of test are highly variable (other examples  
14 shown in **Figure S-29**) despite the fact that the distribution of scores that includes only the top score from  
15 each spectrum is bimodal (**Figure 1**) and the results were verified with previously published manual  
16 analysis. We believe that the poor distinction of top scores for matches to single spectra results from the  
17 high similarity among the identified fragments for competing glycopeptides. Another contributing factor  
18 is the lack of a sufficient number of false matches to fill out the random distribution, precluding local (per  
19 spectrum) statistical inferences, even in cases where the top two scores are substantially separated, as for  
20 the data in **Table S-5**.<sup>58-59</sup> Although not employed here, a probability-based approach such as MS-GF<sup>60</sup>  
21 could be used for local statistics regardless of the distribution and number of theoretical assignments for  
22 each spectrum; however, such an analysis would require modification of MS-GF to handle P and PN ions,  
23 glycan losses from precursor, etc.; extensive modifications which have yet to be implemented.

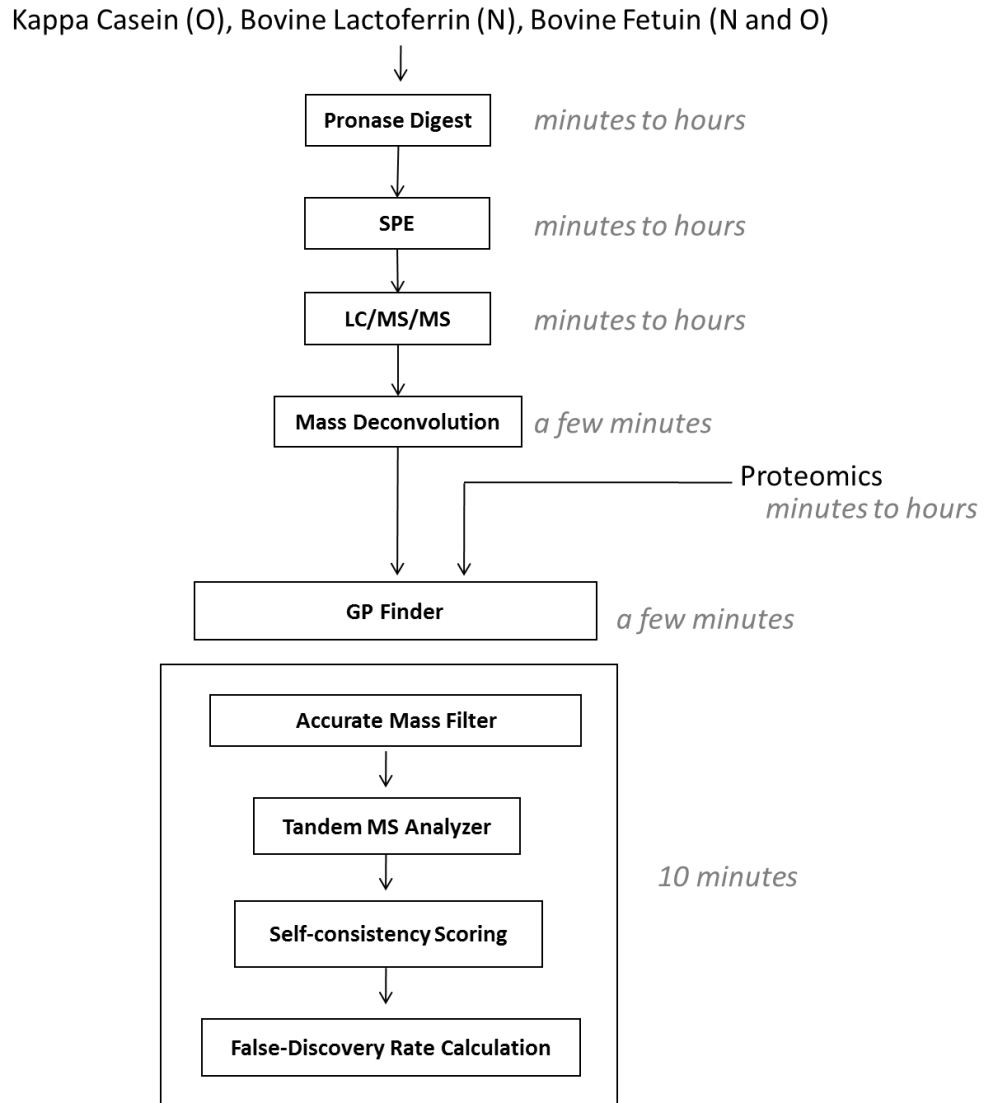

Figure S-1. Workflow. Experimental and data analysis workflow for SSG with non-specific proteolysis and in-house software called GP Finder.

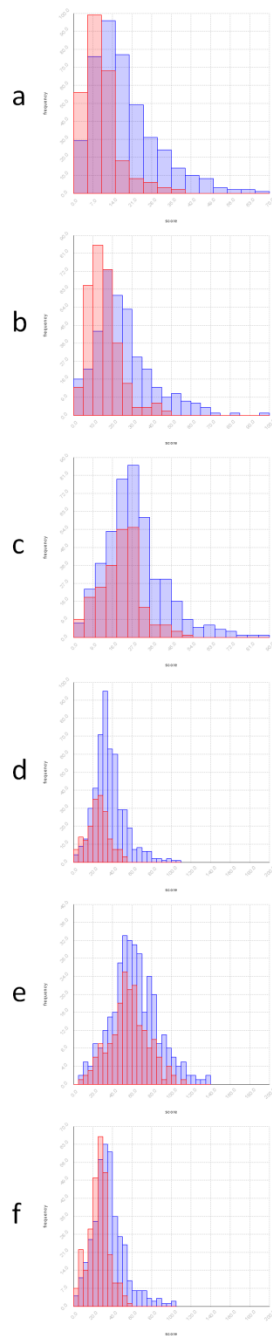

Figure S-2. Analysis of cocktail data with kappa casein protein sequence. A. Base-score only B. Family-size self-consistency boost C. Family-average self-consistency boost ignoring family size D. Family-average self-consistency boost with consideration of family size (standard self-consistency analysis without TDA-compliance) E. Summed family-size and family-average boost F. Family-average self-consistency boost (standard self-consistency analysis with TDA-compliance).



### Precursor mass 2335.8428 Da

| Score | ppm | Protein            | Site | Peptide | Glycan                        |
|-------|-----|--------------------|------|---------|-------------------------------|
| 78    | 6   | Bovine lactoferrin | 564  | NDTVW   | 8 Hex 2 HexNAc                |
| 66    | 1   | Kappa casein       | 157  | TTE     | 4 Hex 3 HexNAc 3 dHex 1 NeuAc |

| Fragment       | Mass     | ppm | Self-consistent data  | O-link fragment matches |
|----------------|----------|-----|-----------------------|-------------------------|
| ND             | 229.061  | 37  | NDT 7 Hex 2 HexNAc    | 10 glycopeptides        |
| NDTVW          | 633.292  | 26  | NDTVW 7 Hex 2 HexNAc  | 20 glycans              |
| NDTVW HexNAc   | 836.333  | 27  | NDTVW 8 Hex 2 HexNAc  | No P, PN, or b/y p.     |
| 8 Hex 1 HexNAc | 1488.472 | 20  | NDTVWE 8 Hex 2 HexNAc |                         |
|                |          |     | NDTV 9 Hex 2 HexNAc   |                         |
|                |          |     | NDTVW 9 Hex 2 HexNAc  |                         |

TTE 4 Hex 3 HexNAc 3 dHex 1 NeuAc  
TTE 4 Hex 3 HexNAc 3 dHex 2 NeuAc

#### Average fragment ppm error

27 ± 18 N-glycopeptide

33 ± 21 O-glycopeptide

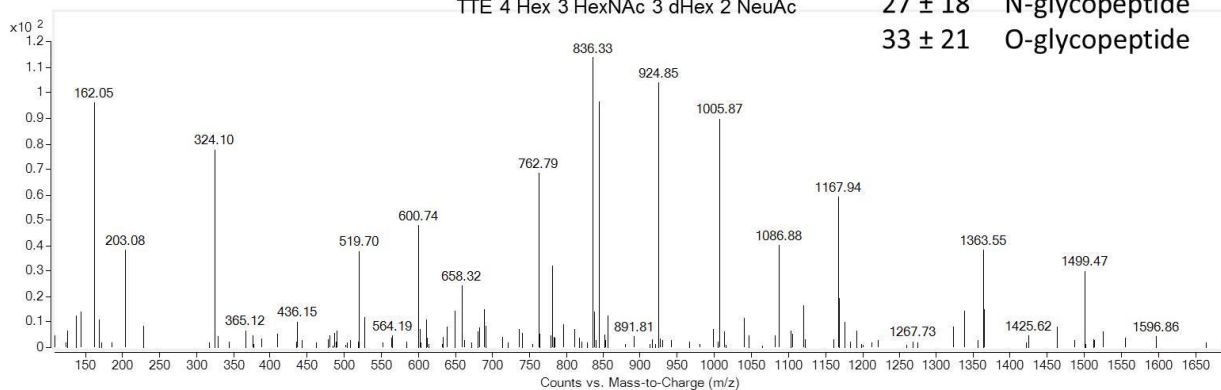

Figure S-3. Example of the evidence available for disambiguating the overlapping assignments above 5% FDR for both N- and O-glycopeptides.

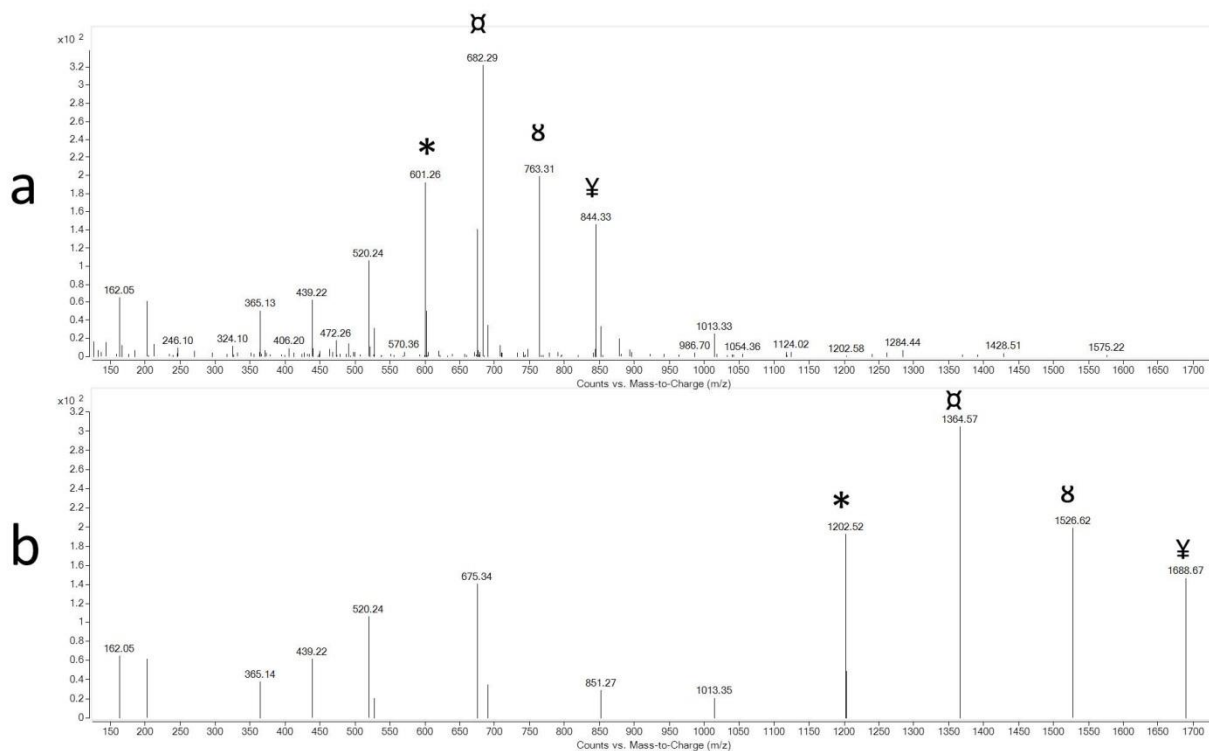

Figure S-4. Difference in N-glycopeptide tandem MS mass deconvolution by changing the molecular composition assumption. A. Mass deconvolution with assumption of organic molecular composition failed to deconvolve four glycopeptide peaks. B. Mass deconvolution with unbiased assumption of molecular composition successfully deconvolved four glycopeptide peaks while failing to deconvolve many smaller glycopeptides and peptides. \* IVNQ + 2Hex:2HexNAc α IVNQ + 3Hex:2HexNAc δ IVNQ + 4Hex:2HexNAc ¥ IVNQ + 5Hex:2HexNAc

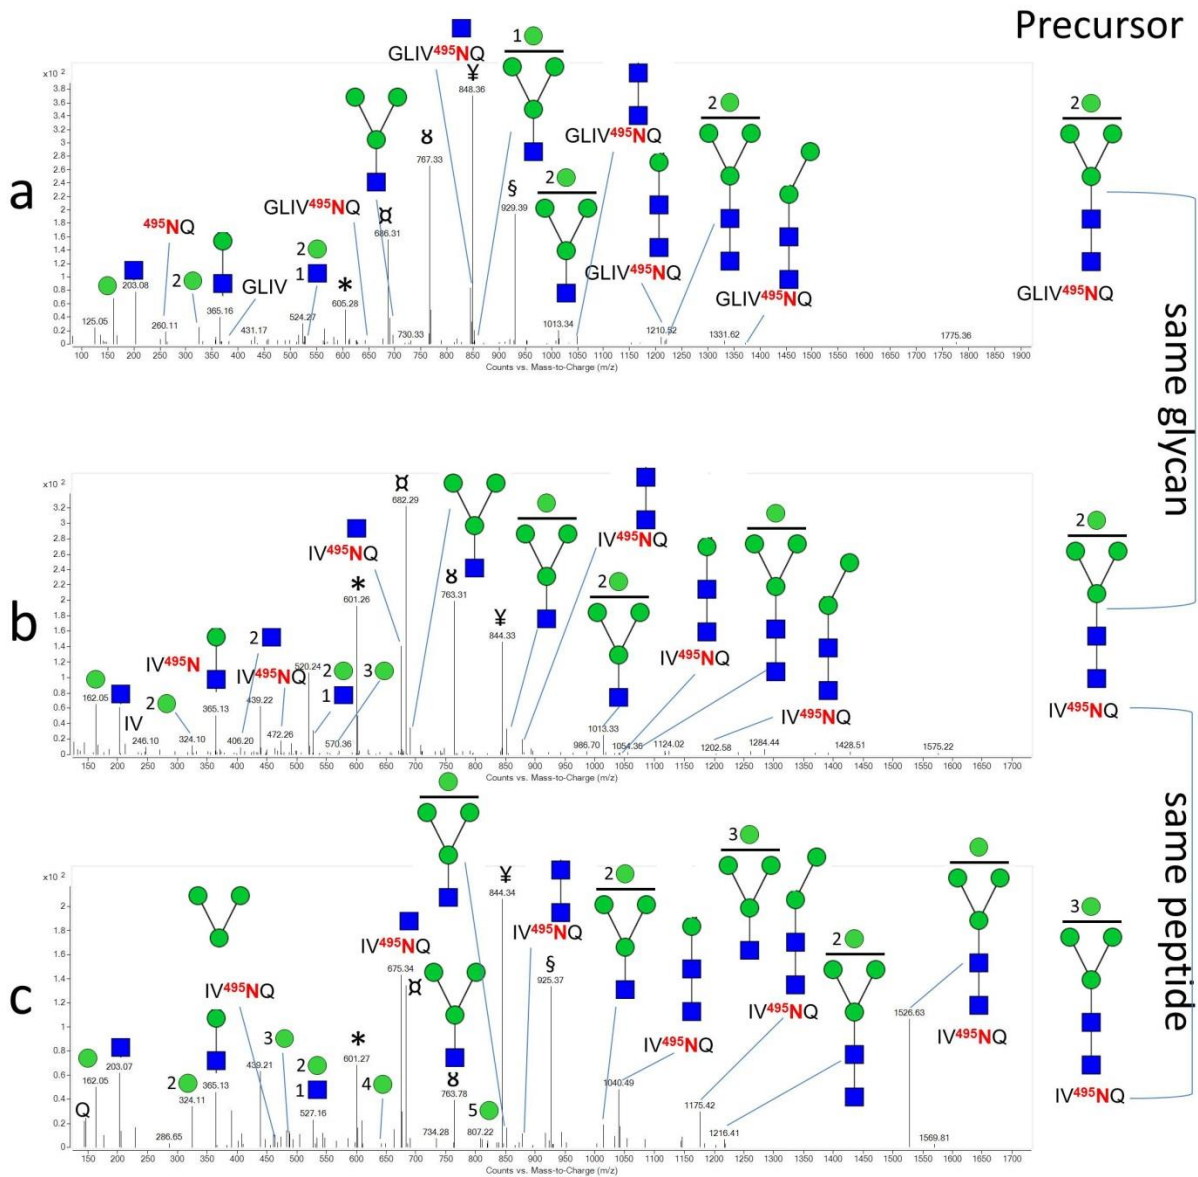

Figure S-5. Tandem mass spectra of site-specific N-glycopeptide analysis at site 495 of bovine lactoferrin. Glycan self-consistency is shown in a and b. Peptide self-consistency is shown in b and c. Blue squares: HexNAc, Green circles: Hex (mannose): \* intact peptide + 2Hex:2HexNAc ⌘ intact peptide + 3Hex:2HexNAc ⌘ intact peptide + 4Hex:2HexNAc ⌘ intact peptide + 5Hex:2HexNAc § intact peptide + 6Hex:2HexNAc

# Eliminating Unlikely Glycopeptide Fragments

N-linked

1. if  $\text{Hex} > 0 \rightarrow \text{HexNAc} \geq 2$
2. if  $\text{HexNAc} \geq 4 \rightarrow \text{Hex} \geq 2$
3.  $\text{HexNAc} \geq \text{dHex}$
4. if  $\text{dHex} \geq 2 \rightarrow \text{Hex} \geq 2 \ \& \ \text{HexNAc} \geq 3$
5. if  $\text{NeuAc} = 1 \rightarrow \text{Hex} \geq 3 \ \& \ \text{HexNAc} \geq 3$
6. If  $\text{NeuAc} \geq 2 \rightarrow \text{Hex} \geq 4 \ \& \ \text{HexNAc} \geq 4$
7.  $\text{Hex} \geq \text{NeuAc}$

O-linked

1.  $\text{HexNAc} \geq 1$

Glycopeptide N-linked Rule # 5

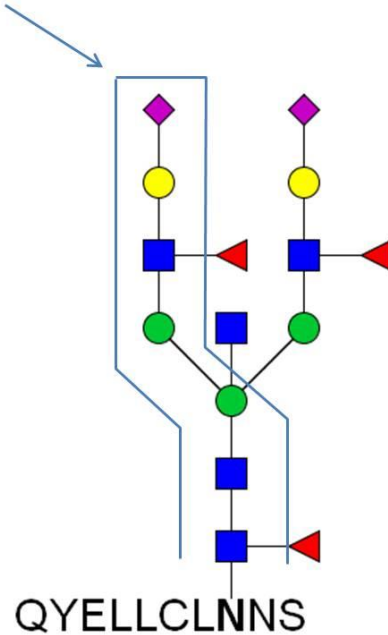

Figure S-6. Rules for fragments of glycopeptides that are allowed by GP Finder.

# Composition Rules for Assigning Glycan Only Fragments

N-linked

1. HexNAc  $\geq$  dHex
2. Hex  $\geq$  NeuAc
3. if NeuAc  $>$  1  $\rightarrow$  Hex  $\geq$  3 & HexNAc  $\geq$  2

O-linked

1. HexNAc + Hex  $\geq$  NeuAc
2. HexNAc + Hex  $\geq$  dHex

Glycan N-linked Rule # 3

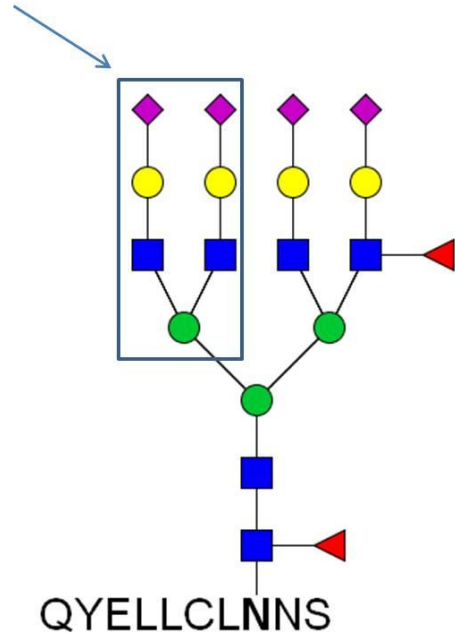

Figure S-7. Rules for fragments of glycans that are allowed by GP Finder.

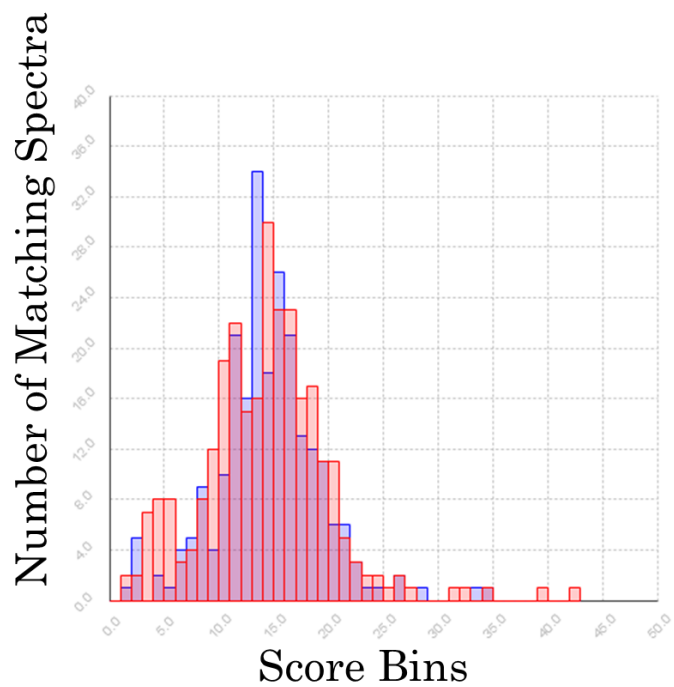

Figure S-8. Decoy Validation. Results from the dataset-bias test for the mixture of bovine fetuin, lactoferrin, and kappa casein. Score distribution of the target and decoy matches compete for top matches to false tandem spectra to reveal bias between the decoy and target scores. The two distributions are shown here to be approximately equivalent.

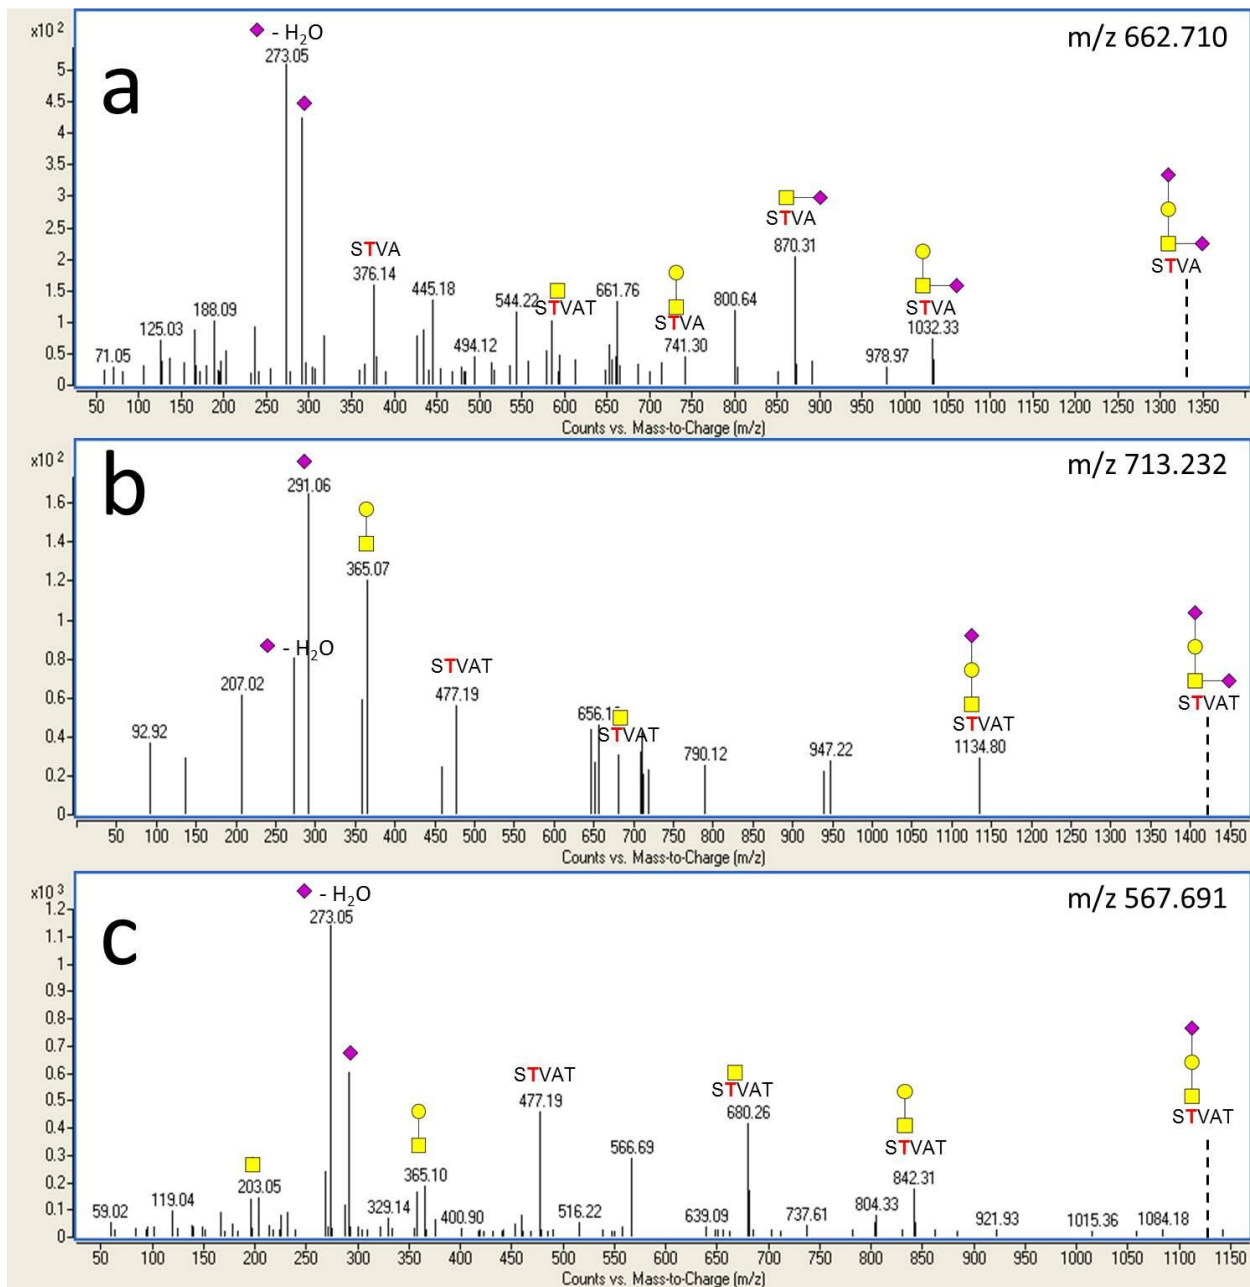

Figure S-9. Example of SSG with O-glycopeptides from kappa casein site 163. Glycan self-consistency is shown with a and b. Peptide self-consistency is shown with b and c.

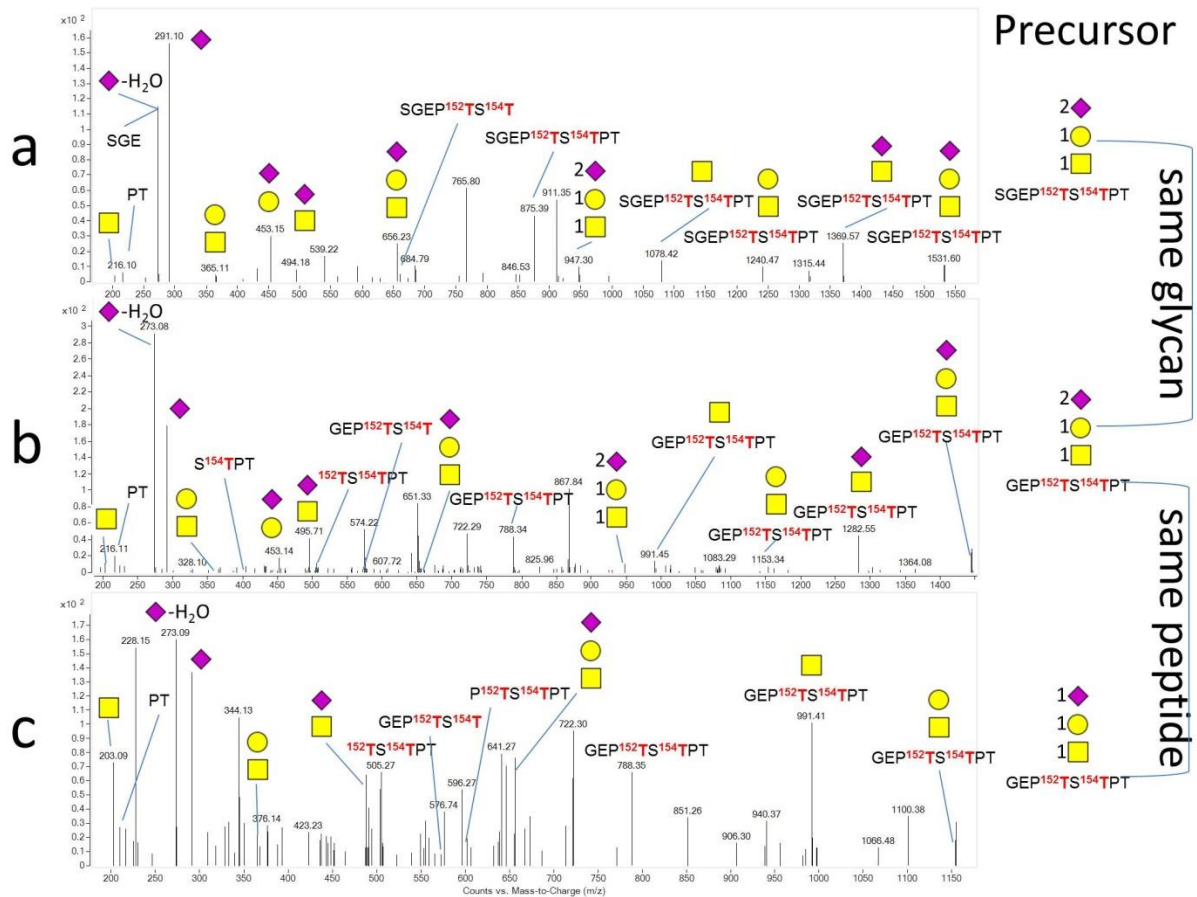

Figure S-10. Self-consistent Data. Tandem mass spectra of site-directed O-glycopeptide analysis at sites 152 and 154 of bovine kappa casein. Glycan self-consistency is shown in a and b. Peptide self-consistency is shown in b and c. Yellow squares: HexNAc, Yellow circles: Hex, Purple diamonds: NeuAc.



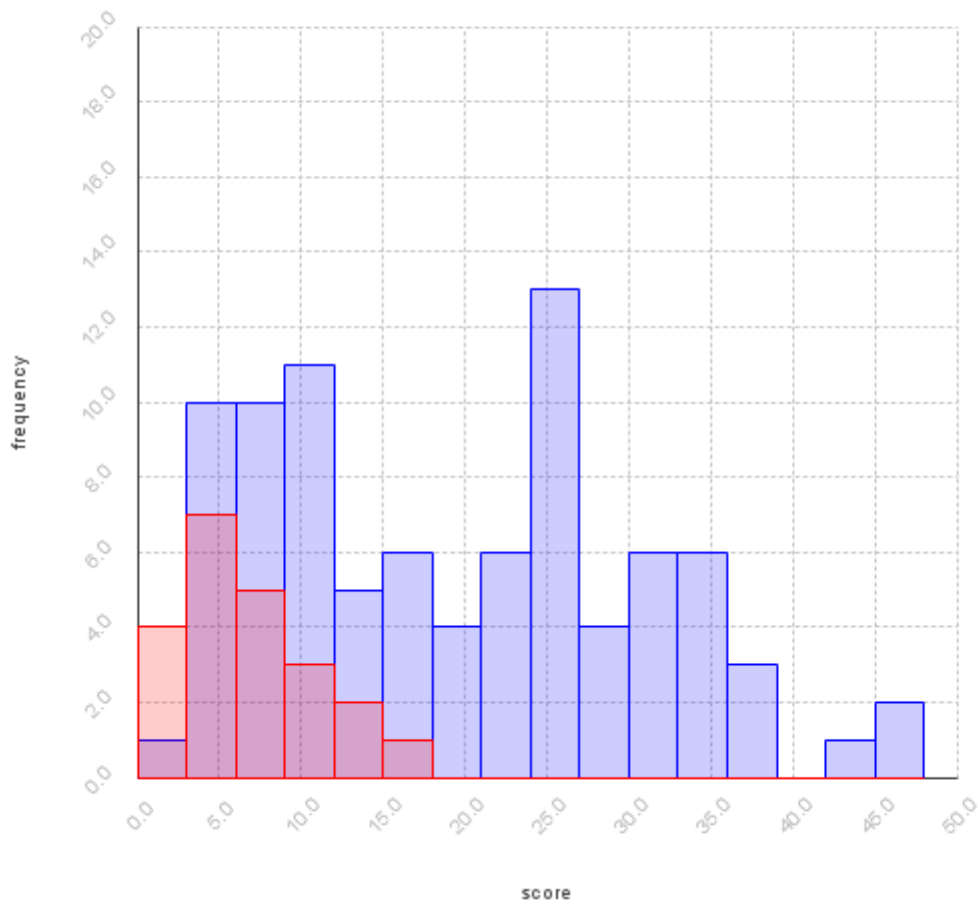

Figure S-11. RNaseB Scores. Histogram of all top-scoring matches for RNaseB. All manually assigned matches scored above the calculated 5% FDR threshold. Due to the limited data-points, the decoy and target distributions are rough estimates.

Number of Matching Spectra

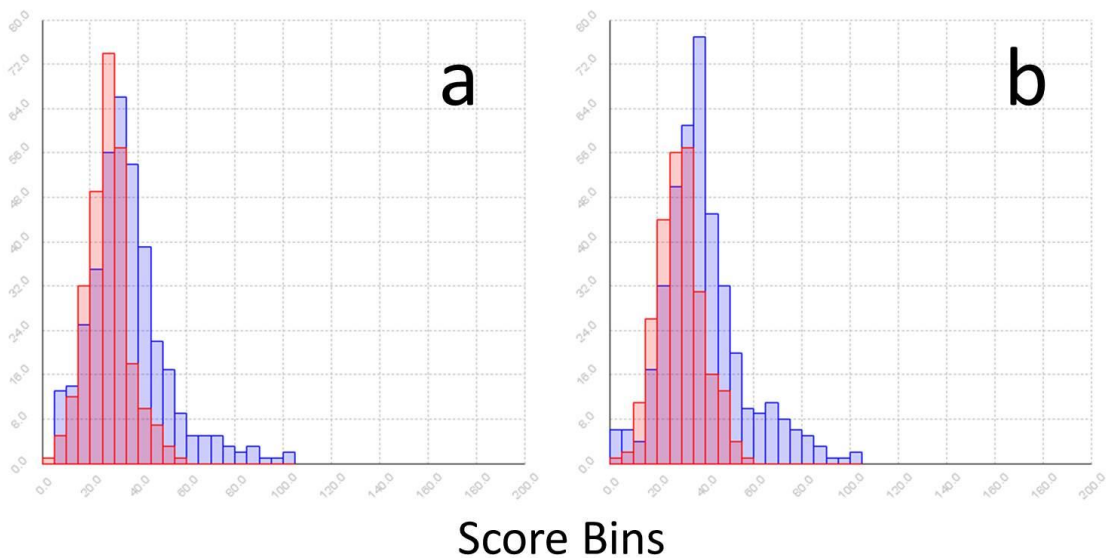

Figure S-12. Example of robust 5%FDR. Many legitimate spectra only match when both of the correct glycoproteins are considered. A. Analysis of cocktail data with sequence of kappa casein generates 36 matches over the score threshold of 55. B Analysis of cocktail data with sequences of kappa casein and bovine fetuin (both O-linked and known to be in sample) generates 61 matches over the score threshold of 55.

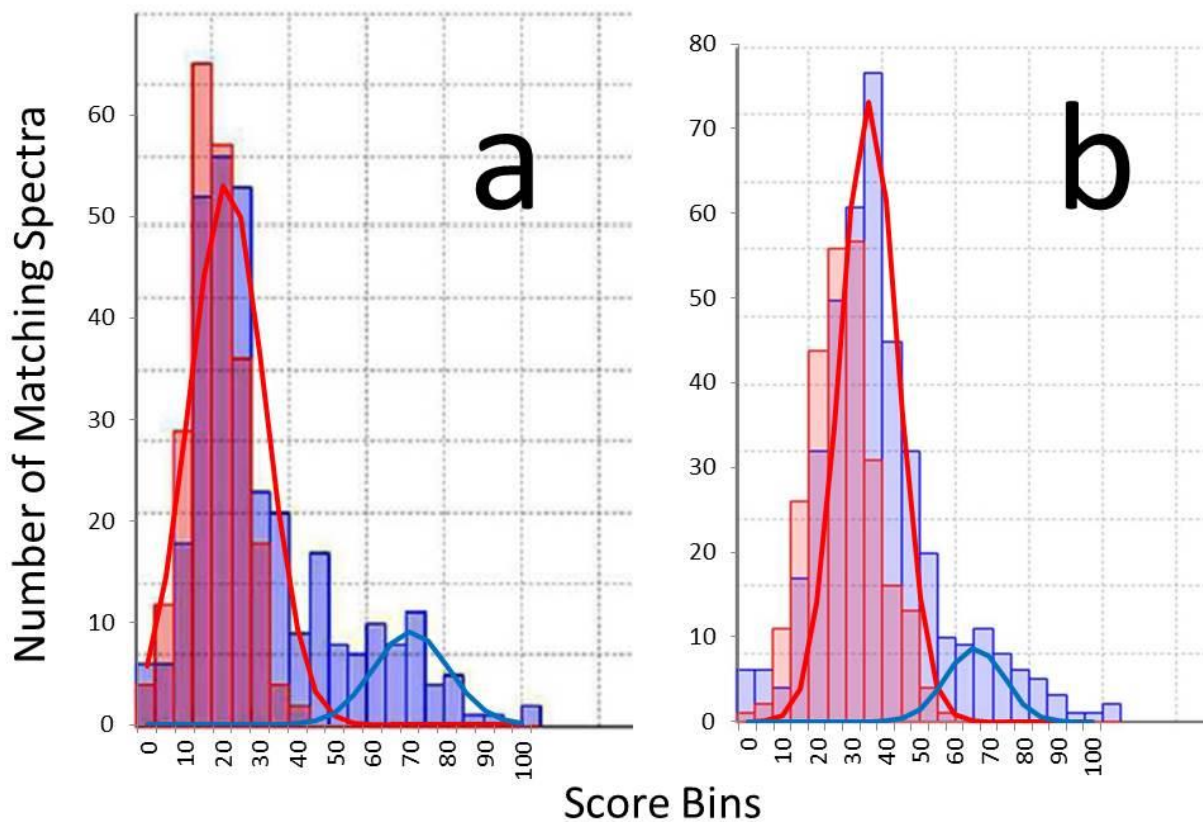

Figure S-13. Example of robust alternate technique for estimating FDR. The score distributions of the target datasets (blue histogram bars) were deconvoluted with commercial software (PeakFit) to estimate the key underlying true positive match (blue line) and negative match (red line) distributions. A. N-linked glycopeptide analysis of three-protein mixture. B. O-linked glycopeptide analysis of three-protein mixture.

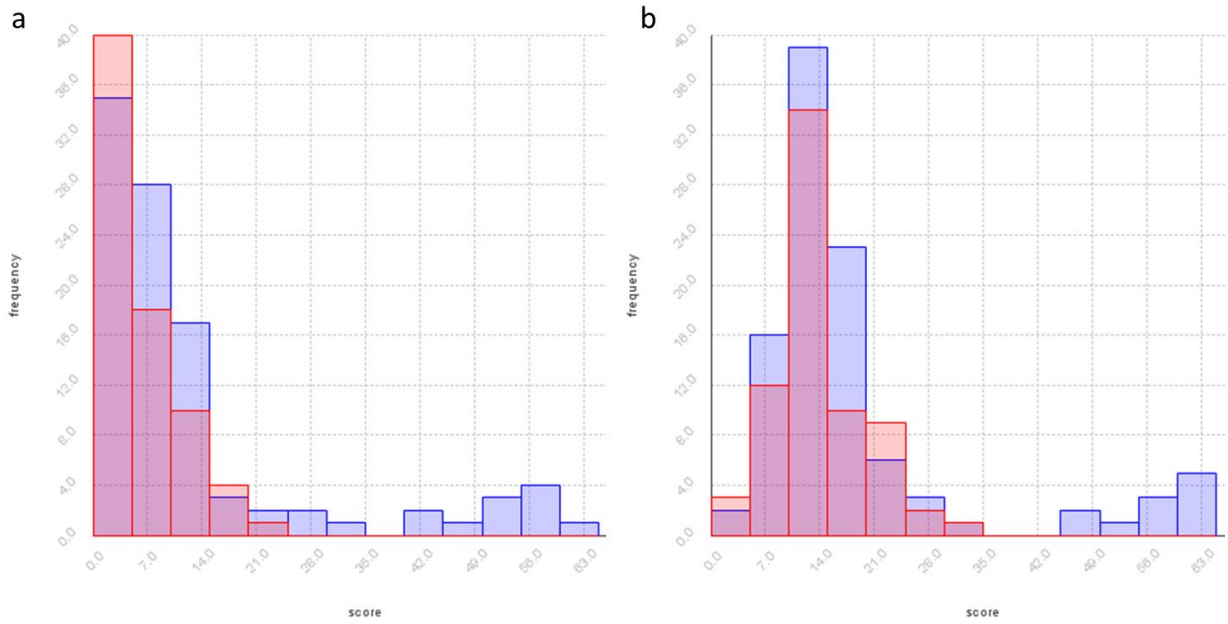

Figure S-14. vLDL Scores. Histograms of the target and decoy score distributions for two O-type glycoproteins (APOE and APOC3) extracted from vLDL nanoparticles. a. Without self-consistency scoring. b. With TDA-compliant self-consistency scoring. Due to the limited data-points, the decoy and target distributions are rough estimates even though the histogram show the actual results.

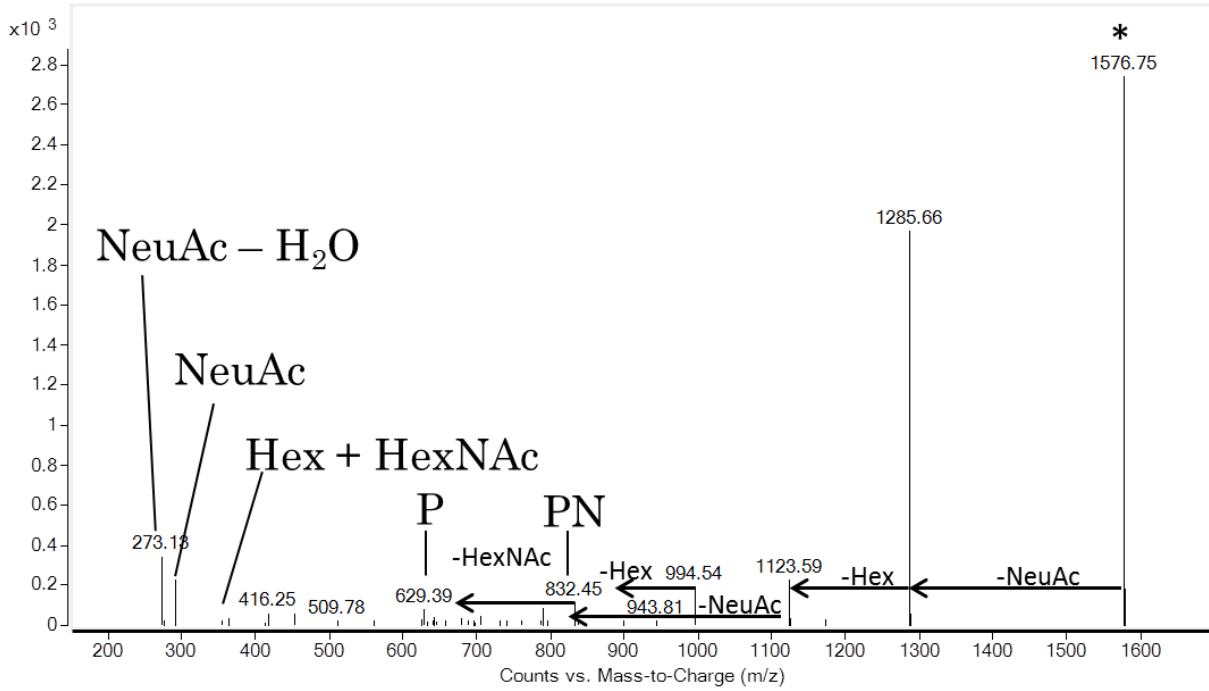

Figure S-15. Structure Analysis. Tandem mass spectrum (neutral mass) of an O-glycopeptide from site 94 of APOC3 that is composed of 1Hex:1HexNAc:2NeuAc + (V)RPTSA(V). The combination of P and PN, B- and Y-glycopeptide fragments and diagnostic oxonium ions provide evidence for the assignment.

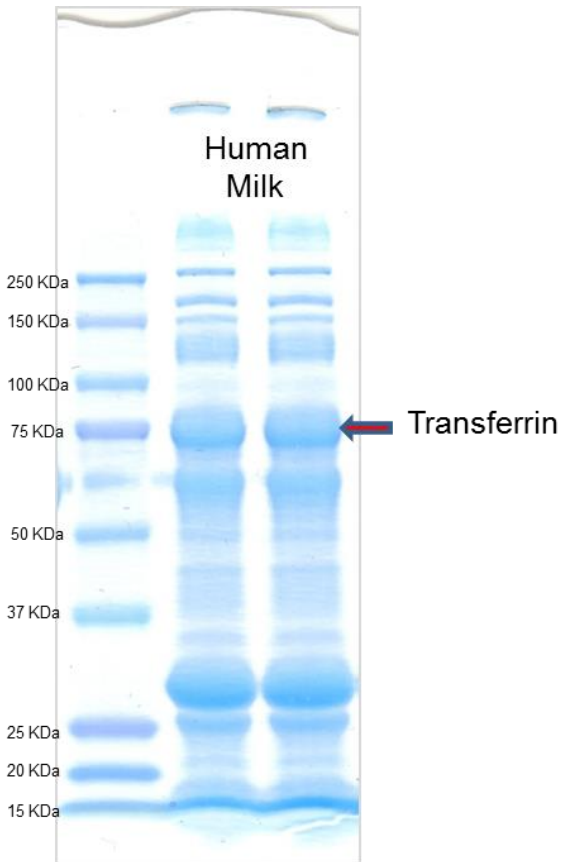

## Rapid INPEG Approach

- 1-D gel analysis of crude human milk
- Excise identified lactoferrin band
- Digest gel pieces with pronase
- Extract glycopeptide digests
- MS and Tandem MS/MS analyses

Figure S-16. INPEG. Scan of gel-separated proteins and glycoproteins from human milk. The newly developed strategy greatly simplifies mixtures. The strategy is called In-gel Nonspecific Proteolysis for Elucidating Glycoproteins (INPEG). Parallel specific and non-specific proteolysis can be performed from components within the same excised band or by excising components for each digestion from nearly identical bands from two parallel lanes.

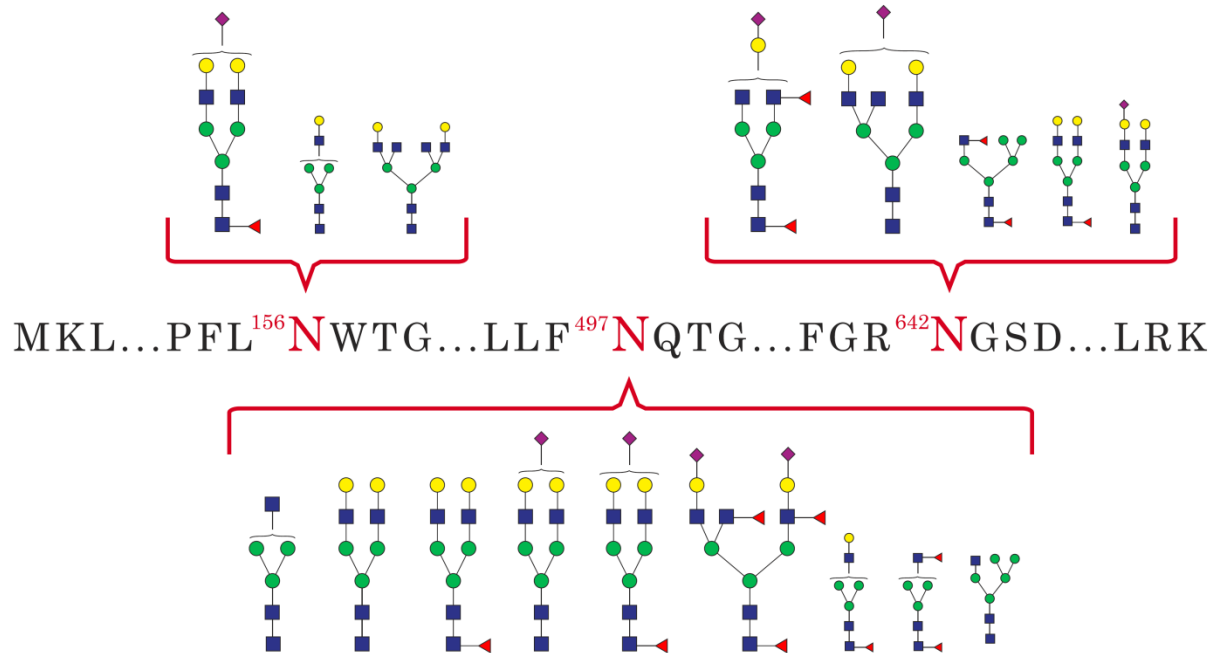

Figure S-17. SSG Map of an N-Glycoprotein. SSG analysis of lactoferrin from human milk. More abundant glycan species are indicated by greater size of glycan cartoon at each site. Blue squares: HexNAc, Yellow circles: Hex (galactose), Green circles: Hex (mannose), Purple diamonds: NeuAc, Red triangles: dHex (fucose).

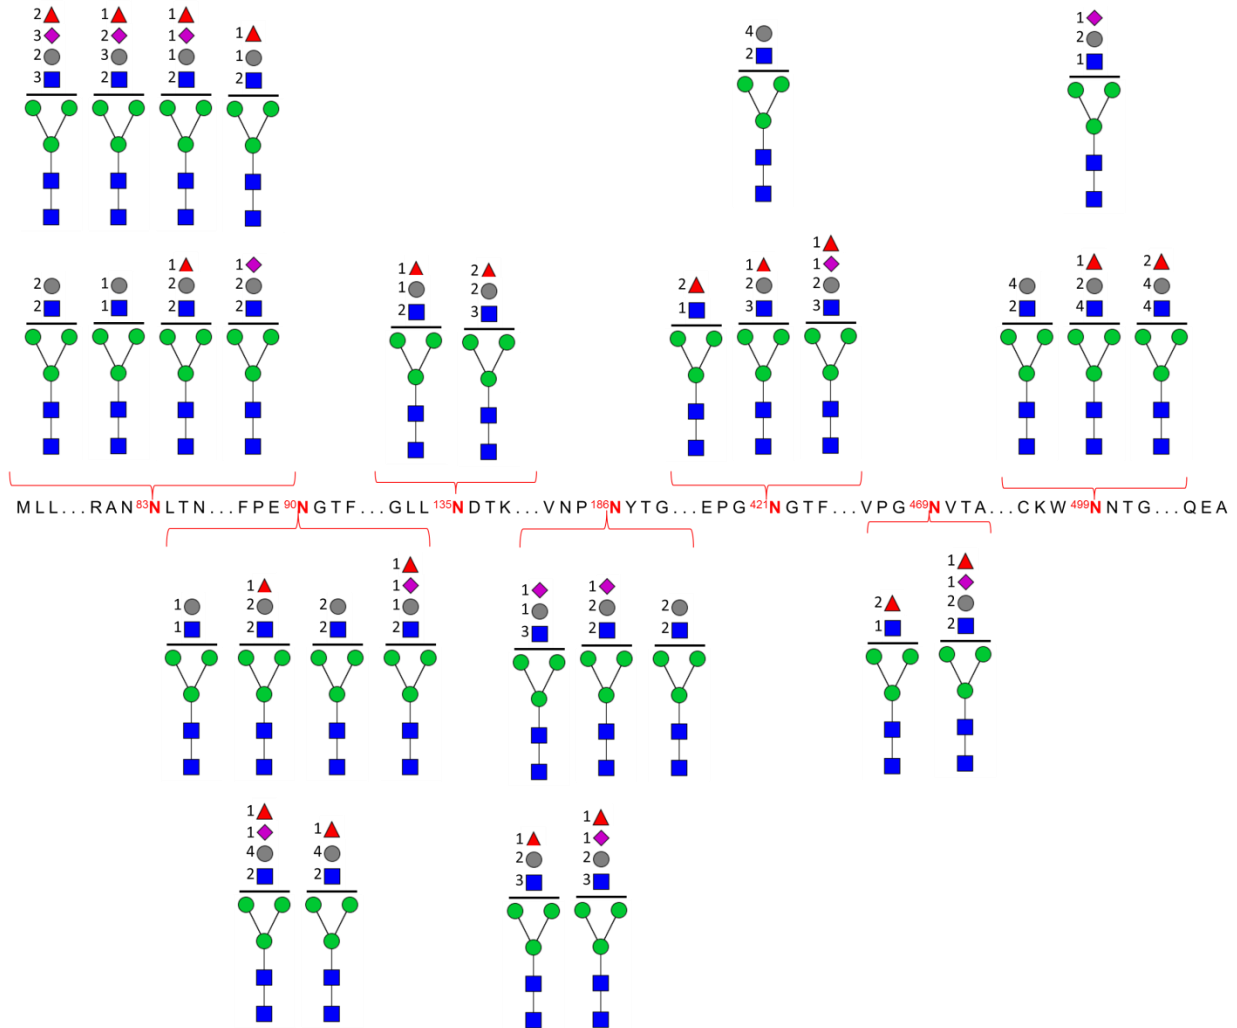

Figure S-18. SSG Map for Polymeric Immunoglobulin Receptor. SSG of polymeric immunoglobulin receptor from human milk, one of two glycoproteins isolated in a gel band after SDS-PAGE of raw human milk. Blue squares: HexNAc, Gray circles: Hex (galactose), Green circles: Hex (mannose), Purple diamonds: NeuAc, Red triangles: dHex (fucose)



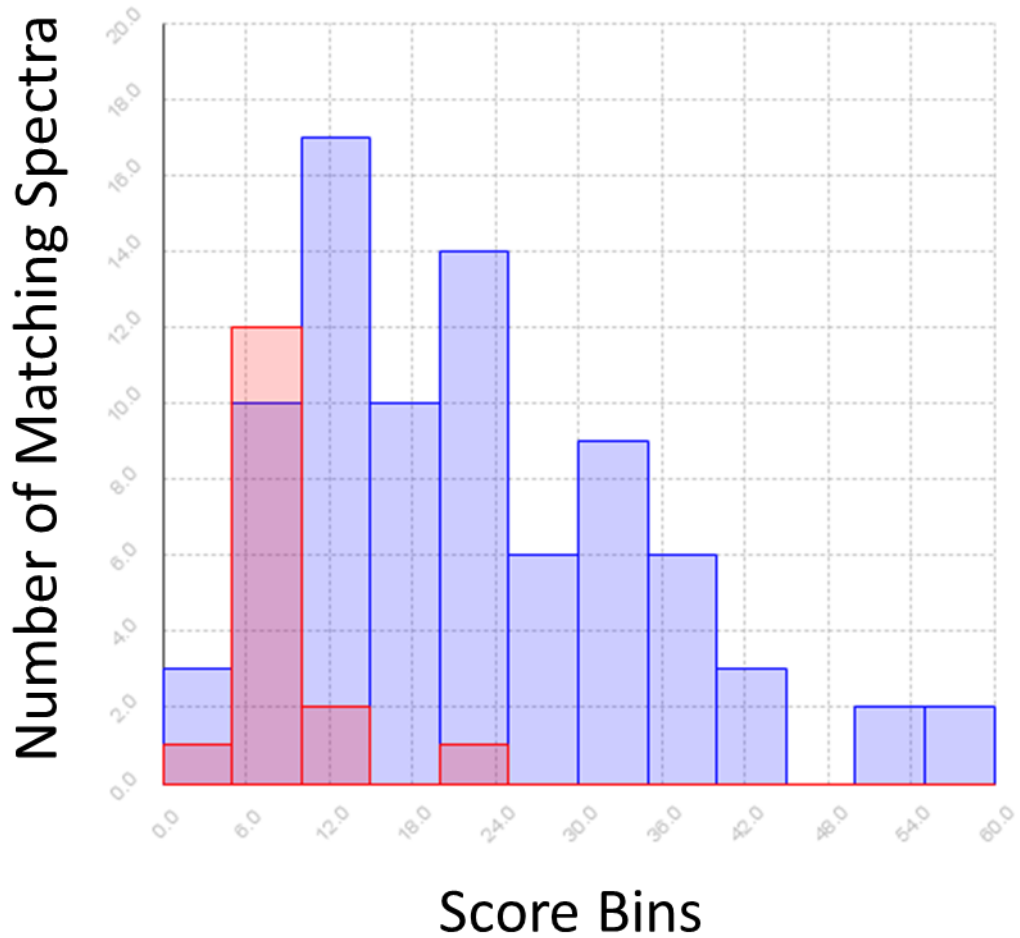

Figure S-19. Polymeric Immunoglobulin Receptor Scores. Histogram of top-scoring matches for human transferrin and polymeric immunoglobulin receptor, both isolated in a gel band after SDS-PAGE of raw human milk. Due to the limited data-points, the decoy and target distributions are rough estimates.

Figure S-20. *in silico* Non-Specific Digest Algorithm. Algorithm for the generation of theoretical peptide tags around glycosites with non-specific protease

```
//iterate through list of glycosites
for (int j = nextSiteIndex; j < glycositeNum; j++) {
    int n = 0;
    double extendedFragmentMass = 0;
    double fragmentMass = 0.0;
    int residueShiftNum = 0;
    int glycosite = (Integer) glycosites.get(j);
    String fragmentResidue = "";
    String extendedFragmentResidues = "";
    do {
        int s = 0;//variable s determines the number of amino acids to the left of the current center
        //current center starts with glycosite and moves to the right with "residueShiftNum++"
        do {
            if (extendedFragmentMass == 0) {first
                fragmentMass = nextRightMass(glycosite, residueShiftNum, annotatedSequenceList);
                if (fragmentMass >= highGlycopeptideMass) {
                    break;
                }
            }
            if (residueShiftNum <= rightResidueLimit) {conditional statement allows the user to limit the number residues searched to right of glycosite
```

```

    fragmentResidue = nextRightResidue(glycosite, residueShiftNum, annotatedSequenceList);

    extendedFragmentMass = fragmentMass;

    extendedFragmentResidues = fragmentResidue;

} else {

    break;

}

}

ArrayList data = new ArrayList();

//add current peptide information to a self-contained list that will be added to the list of theoretical peptides
data.add(glycosite + 1);//glycosites
data.add(extendedFragmentMass);//peptide mass (theoretical used also as experimental)
data.add(extendedFragmentResidues);//amino acid sequence of peptide backbone
data.add(sequenceFileName);//name of protein sequence file name (FASTA formatted file)
data.add(s);//position of site on peptide
peptideCalc.add(k, data);

s++;//current distance on left of center (reference) amino acid, iterates toward the left

k++;//count of generated peptides

if ((glycosite - s) >= 0) {

    if (s <= leftResidueLimit) { //conditional statement allows the user to limit the number residues searched to left of glycosite

        extendedFragmentMass += nextLeftMass(glycosite, s, annotatedSequenceList);
    }
}

```

```

        extendedFragmentResidues = nextLeftResidue(glycosite, s, annotatedSequenceList) + extendedFragmentResidues;
    } else {
        break;
    }
} else {
}

//stop searching to left if current peptide mass is larger than largest experimental glycopeptide mass or if left side of protein sequence is reached
} while (extendedFragmentMass < highGlycopeptideMass && (glycosite >= s));
if (((aminoAcidSequenceLen - 1) - glycosite) > residueShiftNum) { //deal with glycosites close to the right end of the protein sequence
    residueShiftNum++; //iterate to the right of the glycosite
    if (residueShiftNum <= rightResidueLimit) { //conditional statement allows the user to limit the number residues searched to right of glycosite
        fragmentMass += nextRightMass(glycosite, residueShiftNum, annotatedSequenceList);
        fragmentResidue += nextRightResidue(glycosite, residueShiftNum, annotatedSequenceList);
        extendedFragmentMass = fragmentMass;
        extendedFragmentResidues = fragmentResidue;
    } else {
        break;
    }
} else {
    residueShiftNum++;
}

```

```

    }
    } while ((fragmentMass < highGlycopeptideMass) && (((aminoAcidSequenceLen) - glycosite) > residueShiftNum));
}

int extendedFragmentMassIndex = 1;

Collections.sort(peptideCalc, new ListComparator(extendedFragmentMassIndex, true));

//provide the mass of the next amino acid to the right

public double nextRightMass(int glycosite, int residueShiftNum, ArrayList annotatedSequenceList) {

    double residueMass = (Double) ((ArrayList) annotatedSequenceList.get(glycosite + residueShiftNum)).get(1);

    return residueMass;

}

//provide the letter of the next amino acid to the right

public String nextRightResidue(int glycosite, int residueShiftNum, ArrayList annotatedSequenceList) {

    String residue = (String) ((ArrayList) annotatedSequenceList.get(glycosite + residueShiftNum)).get(0);

    return residue;

}

//provide the mass of the next amino acid to the left

public double nextLeftMass(int glycosite, int m, ArrayList annotatedSequenceList) {

    double residueMass = (Double) ((ArrayList) annotatedSequenceList.get(glycosite - m)).get(1);

    return residueMass;

}

```

```
//provide the letter of the next amino acid to the right  
public String nextLeftResidue(int glycosite, int m, ArrayList annotatedSequenceList) {  
    String residue = (String) ((ArrayList) annotatedSequenceList.get(glycosite - m)).get(0);  
    return residue;  
}
```

Figure S-21. Determination of Experimental Glycan Mass Algorithm. Algorithm for the calculation of all potential glycan masses by subtracting theoretical peptide masses from experimental glycopeptide masses

```
for (int i = nextMassIndex; i < massListLen; i++) {  
    j = 0;  
    double mass = ((Double) ((ArrayList) massList.get(i)).get(0)) * charge;  
    if (mass > ((Double) ((ArrayList) peptideCalc.get(j)).get(GlobalConstants.peptideMassIndex))) {  
        do {  
            //Add on the OH so that the sugar part forms a complete aldehyde  
            GlycanMass = mass - (((Double) ((ArrayList) peptideCalc.get(j)).get(GlobalConstants.peptideMassIndex)));  
            ArrayList data = new ArrayList();  
            data.add(mass); //experimentally observed glycopeptide mass  
            try {  
                intensity = (Double) ((ArrayList) massList.get(i)).get(1);  
            } catch (Exception e) {  
                intensity = -1;  
            }  
            data.add(intensity); //intensity  
            data.add(GlycanMass); //residual mass (will compare with glycan masses)  
            data.add(((ArrayList) peptideCalc.get(j)).get(3)); //sequenceFileName  
            data.add(((ArrayList) peptideCalc.get(j)).get(0)); //glycosite  
            data.add(((ArrayList) peptideCalc.get(j)).get(1)); //peptide mass
```

```

data.add((((ArrayList) peptideCalc.get(j)).get(2)));//peptide sequence

data.add((((ArrayList) peptideCalc.get(j)).get(4)));//site index

if (includeRetentionTime) {

    try {

        data.add((Double) ((ArrayList) massList.get(i)).get(2));//data.add(Double.parseDouble((String)((ArrayList)massList.get(i)).get(2)));

    } catch (Exception e) {

        data.add(-1);

    }

} else {

    data.add(-1);

}

peptideExp.add(k, data);

k += 1;

j += 1;

} while ((j < (peptideCalc.size())) && (mass > ((Double) ((ArrayList) peptideCalc.get(j)).get(GlobalConstants.peptideMassIndex))));

} else {

}

}

Collections.sort(peptideExp, new ListComparator(GlobalConstants.glycanMassIndex, true));

```



Figure S-22. Exhaustive Glycan Library Algorithm. Algorithm for the exhaustive generation of possible glycans

```
Double thisMass;
```

```
for (i = iFrom; i <= iTo; i++) {
```

```
    for (j = jFrom; j <= jTo; j++) {
```

```
        for (k = kFrom; k <= kTo; k++) {
```

```
            for (m = mFrom; m <= mTo; m++) {
```

```
                for (n = nFrom; n <= nTo; n++) {
```

```
                    for (o = oFrom; o <= oTo; o++) {
```

```
                        for (p = pFrom; p <= pTo; p++) {
```

```
                            for (q = qFrom; q <= qTo; q++) {
```

```
                                for (r = rFrom; r <= rTo; r++) {
```

```
                                    thisMass = (Double) ((ArrayList) ResidueParameters.get(0)).get(4) * ((double) i)
```

```
                                        + (Double) ((ArrayList) ResidueParameters.get(1)).get(4) * ((double) j)
```

```
                                        + (Double) ((ArrayList) ResidueParameters.get(2)).get(4) * ((double) k)
```

```
                                        + (Double) ((ArrayList) ResidueParameters.get(5)).get(4) * ((double) m)
```

```
                                        + (Double) ((ArrayList) ResidueParameters.get(3)).get(4) * ((double) n)
```

```
                                        + (Double) ((ArrayList) ResidueParameters.get(4)).get(4) * ((double) o)
```

```
                                        + (Double) ((ArrayList) ResidueParameters.get(6)).get(4) * ((double) p)
```

```
                                        + (Double) ((ArrayList) ResidueParameters.get(7)).get(4) * ((double) q)
```

```
                                        + (Double) ((ArrayList) ResidueParameters.get(8)).get(4) * ((double) r);
```

```

if (thisMass == 0 || ((highGlycanMass > 0.001) && (thisMass.compareTo(highGlycanMass + errorLimit) > 0))) {
}
else {
    ArrayList data = new ArrayList();
    data.add(thisMass);//theoretical glycan mass
    data.add(i);//Hex
    data.add(j);//HexNAc
    data.add(k);//DxyHex
    data.add(n);//NeuAc
    data.add(o);//NeuGC
    data.add(m);//Pent
    data.add(p);//KDN
    data.add(q);//HexA
    data.add(r);//user defined A
    data.add(glycanIDNum++);
    glycanCalc.add(L, data);
    L++;
}
}
}

```

```
    }  
  }  
}  
}
```

```
Collections.sort(glycanCalc, new ListComparator(0, true));//sortObj.quickSort(glycanCalc, 0);
```

Figure S-23. Matching Theoretical and Experimental Possibilities Algorithm. Algorithm for the comparison of the theoretical glycan masses and the residual mass of the experimental data after subtracting the theoretical peptides

```
if (errorType.equals("ppm")) {  
    errorFactor = errorLimit / 1000000;  
    errorIsPPM = true;  
} else {  
    epsilonStandard = errorLimit;  
    errorIsPPM = false;  
}  
  
for (i = 0; i < tempLongListLen; i++) {  
    residualGlycan = (Double) ((ArrayList) peptideExp.get(i)).get(2);  
    for (k = lowest; k < tempGlycanListLen; k++) {  
        realGlycan = (Double) ((ArrayList) glycanCalc.get(k)).get(0);  
        realGlycanWithCharges = realGlycan * charge;  
        if (errorType.equals("ppm")) {  
            epsilonStandard = errorFactor * (realGlycanWithCharges + (Double) ((ArrayList) peptideExp.get(i)).get(5)); //get GPMass  
        }  
        if ((realGlycanWithCharges - epsilonStandard) > residualGlycan){  
            break;  
        }  
        if ((realGlycanWithCharges + epsilonStandard) < residualGlycan){
```

```

lowest = k + 1;

continue;

}

if (((realGlycanWithCharges - epsilonStandard) <= residualGlycan) && ((realGlycanWithCharges + epsilonStandard) >= residualGlycan)){

    ArrayList data = new ArrayList();

    data.add(((ArrayList) peptideExp.get(i)).get(0)); //0 experimentally observed glycopeptide mass

    data.add(((ArrayList) peptideExp.get(i)).get(1)); //1 intensity

    data.add(((ArrayList) peptideExp.get(i)).get(2)); //2 residual glycan mass (will compare with glycan masses)

    data.add(realGlycan); //theoretically calculated glycan mass

    if (errorIsPPM) {

        data.add(Math.abs(((realGlycanWithCharges - residualGlycan) / (realGlycanWithCharges + (Double) ((ArrayList) peptideExp.get(i)).get(5))) *
1000000));

        //ppm error

    } else {

        data.add(Math.abs(realGlycanWithCharges - residualGlycan));

        //Dalton error

    }

    data.add(((ArrayList) glycanCalc.get(k)).get(1)); //4 ChargeCarrier

    data.add(((ArrayList) glycanCalc.get(k)).get(2)); //5 Hex

    data.add(((ArrayList) glycanCalc.get(k)).get(3)); //6 HexNAc

    data.add(((ArrayList) glycanCalc.get(k)).get(4)); //7 DxyHex

    data.add(((ArrayList) glycanCalc.get(k)).get(5)); //8 NeuAc

```

```

data.add(((ArrayList) glycanCalc.get(k)).get(6));//9 NeuGC
data.add(((ArrayList) glycanCalc.get(k)).get(7));//10 Pent
data.add(((ArrayList) glycanCalc.get(k)).get(8));//11 KDN
data.add(((ArrayList) glycanCalc.get(k)).get(9));//12 HexA
int userDef = ((Integer) ((ArrayList) glycanCalc.get(k)).get(10)).intValue();
data.add(userDef);//13 user defined A
String protName = (String) (((ArrayList) peptideExp.get(i)).get(3));
if (userDef >= 1 && runAutomatedDecoy == true) {
    protName = "DECOY_" + protName;
}
data.add(protName);//14 sequenceFileName
data.add(((ArrayList) peptideExp.get(i)).get(4));//15 glycosite
data.add(((ArrayList) peptideExp.get(i)).get(5));//16 observed peptide mass (same as theoretical peptide mass)
data.add(((ArrayList) peptideExp.get(i)).get(6));//17 peptide sequence
data.add(((ArrayList) glycanCalc.get(k)).get(11));//18
data.add(((ArrayList) peptideExp.get(i)).get(7));
FindGlycopeptides.serialNumber = serialNumber;
data.add(((ArrayList) peptideExp.get(i)).get(8));//20 retention time
glycanExp.add(j, data);
j++;

```

```
    }  
  }  
}  
Collections.sort(glycanExp, new ListComparator(0, true));
```

Figure S-24. Algorithms for removing glycan and glycopeptide fragments that are unlikely candidates in light of biological glycosylation profiles.

```
class isAcceptableGlycan
//returns false unless a specified condition is met
PossibilitiesObject posObj = (PossibilitiesObject) ((ArrayList) tanPar.getPO()).get(0);

if isNLinked

    if NeuAc or NeuGc <=Hexose
        if Deoxyhexose<=HexNAc
            if NeuAc or NeuGc > 1
                if Hex >= 3
                    if HexNAc >= 2
                        return true;
            else
                return true;
    else
        if Hex = 0
            return true;

if isOLinked
    if (NeuAc + NeuGc) = 1 and all others = 0
        return true
    if dHex = 1 and all others = 0
        return true
    if NeuAc + NeuGc + dHex <= Hexose + HexNAc
        return true

return false

class isAcceptableGlycopeptide
//returns true unless a specified case is met
if isNLinked
//rules for NeuAc
switch NeuAc
```



```
case 0:
    break
case 1:
    if !(Hex >= 3)
        return false
    if !(HexNAc >= 3)
        return false
    break
default:
    if !(Hex >= 4)
        return false
    if !(HexNAc >= 4)
        return false
    if NeuAc > Hex
        return false

    break
```

```
//rules for NeuGC
switch NeuGc
case 0:
    break;
case 1:
    if !(Hex >= 3)
        return false
    if !(HexNAc >= 3)
        return false
    break
default:
    if !(Hex >= 4)
        return false
    if !(HexNAc >= 4)
        return false
    if NeuGC > Hex
```

```
    return false

    break

    if !(Hex >= NeuAc + NeuGc)
        return false

    if dHex >= 2
        if Hex < 2
            return false
        if HexNAc < 3
            return false

    if !(HexNAc > dHex)
        return false

    if HexNAc >= 3
        if !(Hex >= 1)
            return false

    if HexNAc >= 4
        if !(Hex > 1)
            return false

    if Hex >= 1
        if !(HexNAc >= 2)
            return false

    if isOLinked
        if !((Hex + HexNAc) >= NeuAc + NeuGc + dHex)
            return false
        if !(HexNAc > 0)
            return false
```

return true

Figure S-25. Scoring algorithm for tandem MS fragments.

```
class ScoreGenerator
```

```
    ArrayList decoyFamSizeListRandom  
    ArrayList averFamDecoyScoreListRandom  
    ArrayList randomTargetFamSizeList  
    ArrayList averFamRandomTargetScoreList  
    ArrayList targetFamSizeList  
    ArrayList averFamTargetScoreList
```

```
    for each mass
```

```
        for each retention time
```

```
            for each theoretical glycopeptide
```

```
                score = (completePeptideCount * score4CompletePeptide)  
                    + completePeptidePlusHexNACount * score4CompletePeptidePlusHexNAC)  
                    * (completePeptideCount + completePeptidePlusHexNACount)  
                    + (peptideFragmentCount * score4PeptideFragment)  
                    + (intactPeptideWithFragmentedGlycanCount * score4IntactPeptideWithFragmentedGlycanCount)  
                    + (fragmentedPeptideWithFragmentedGlycanCount * score4FragmentedPeptideWithFragmentedGlycanCount)  
                    + (glycanFragmentCount * score4GlycanFragment)
```

```
                baseScore = score.getValue
```

```
                if useSelfConsistency()
```

```
                    peptideFamilyCount = getPeptideFamilyCount(curRH);
```

```
                    if peptideFamilyCount >= minimumFamilyCount
```

```
                        score += peptideFamilyCount * perMemberScore
```

```
                if useNeutralLoss
```

```
                    score += neutralLossCount * 10
```

```
                if useDiagnosticIonBoost()
```

```
                    score += getDiagnosticOxoniumScore
```

```
                if useWaterLoss
```

```
                    score += waterLossCount * 10;
```

```
                if removeData
```

```
                    if score >= scoreThreshold
```

```

        keepDataObj4CurrentTheoreticalGlycopeptide(true)
    if isDecoy
        decoyFamSizeList.add(peptideFamilySize)
        averFamDecoyScoreList.add(score)

int decoyFamSizeSum = 0;
for (int i = 0; i < decoyFamSizeList.size(); i++)
    decoyFamSizeSum += decoyFamSizeList.get(i)
if decoyFamSizeList.size() > 0
    decoyFamSize = decoyFamSizeSum / decoyFamSizeList.size()
double decoyScoreSum = 0.0
for (int i = 0; i < averFamDecoyScoreList.size(); i++)
    decoyScoreSum += averFamDecoyScoreList.get(i)
if (averFamDecoyScoreList.size() > 0)
    averFamDecoyScore = decoyScoreSum / averFamDecoyScoreList.size()

if applyAverageScore
    for each mass
        for each retention time
            for each theoretical glycopeptide
                if useDiagnosticIcnBoost
                    score += getDiagnosticOxoniumScore
                if peptideFamilyCount >= minimumFamilyCount
                    score += peptideFamilyAverage
                if removeData
                    if score >= scoreThreshold
                        keepDataObj4TheoreticalGlycopeptide(true)

for each mass
    for each retention time
        for each theoretical glycopeptide
            if !isDecoy
                targetFamSizeList.add(peptideFamilyCount)
                averFamTargetScoreList.add(getBaseScore);

```

```

        if peptideFamilyCount == decoyFamSize
            randomTargetFamSizeList.add(peptideFamilyCount)
            averFamRandomTargetScoreList.add(getBaseScore)
        else
            decoyFamSizeListAver.add(peptideFamilyCount);
            averFamDecoyScoreListAver.add(getBaseScore)

int decoyFamSizeSum = 0;
for (int i = 0; i < decoyFamSizeList.size(); i++)
    decoyFamSizeSum += decoyFamSizeList.get(i)
if decoyFamSizeList.size() > 0
    decoyFamSize = decoyFamSizeSum / decoyFamSizeList.size()
double decoyScoreSum = 0.0
for (int i = 0; i < averFamDecoyScoreList.size(); i++)
    decoyScoreSum += averFamDecoyScoreList.get(i)
if (averFamDecoyScoreList.size() > 0)
    averFamDecoyScore = decoyScoreSum / averFamDecoyScoreList.size()

int randomTargetFamSizeSum = 0;
for (int i = 0; i < randomTargetFamSizeList.size(); i++)
    randomTargetFamSizeSum += randomTargetFamSizeList.get(i)
if randomTargetFamSizeList.size() > 0
    targetFamSizeRandom = randomTargetFamSizeSum / randomTargetFamSizeList.size()
double randomTargetScoreSum = 0.0
for (int i = 0; i < averFamRandomTargetScoreList.size(); i++)
    randomTargetScoreSum += averFamRandomTargetScoreList.get(i)
if (averFamRandomTargetScoreList.size() > 0)
    averFamRandomTargetScore = randomTargetScoreSum / averFamRandomTargetScoreList.size()

int targetFamSizeSum = 0;
for (int i = 0; i < targetFamSizeList.size(); i++)
    targetFamSizeSum += targetFamSizeList.get(i)

```

```
if targetFamSizeList.size() > 0
    targetFamSizeRandom = targetFamSizeSum / targetFamSizeList.size()
double targetScoreSum = 0.0
for (int i = 0; i < averFamTargetScoreList.size(); i++)
    targetScoreSum += averFamTargetScoreList.get(i)
if (averFamTargetScoreList.size() > 0)
    averFamTargetScore = targetScoreSum / averFamTargetScoreList.size()

double bias = averFamTargetScoreRandom - averFamDecoyScoreAver;

if applyAverageScore && tdaCompliant
    for each mass
        for each retention time
            for each theoretical glycopeptide
                if !isDecoy
                    score -= bias;
```

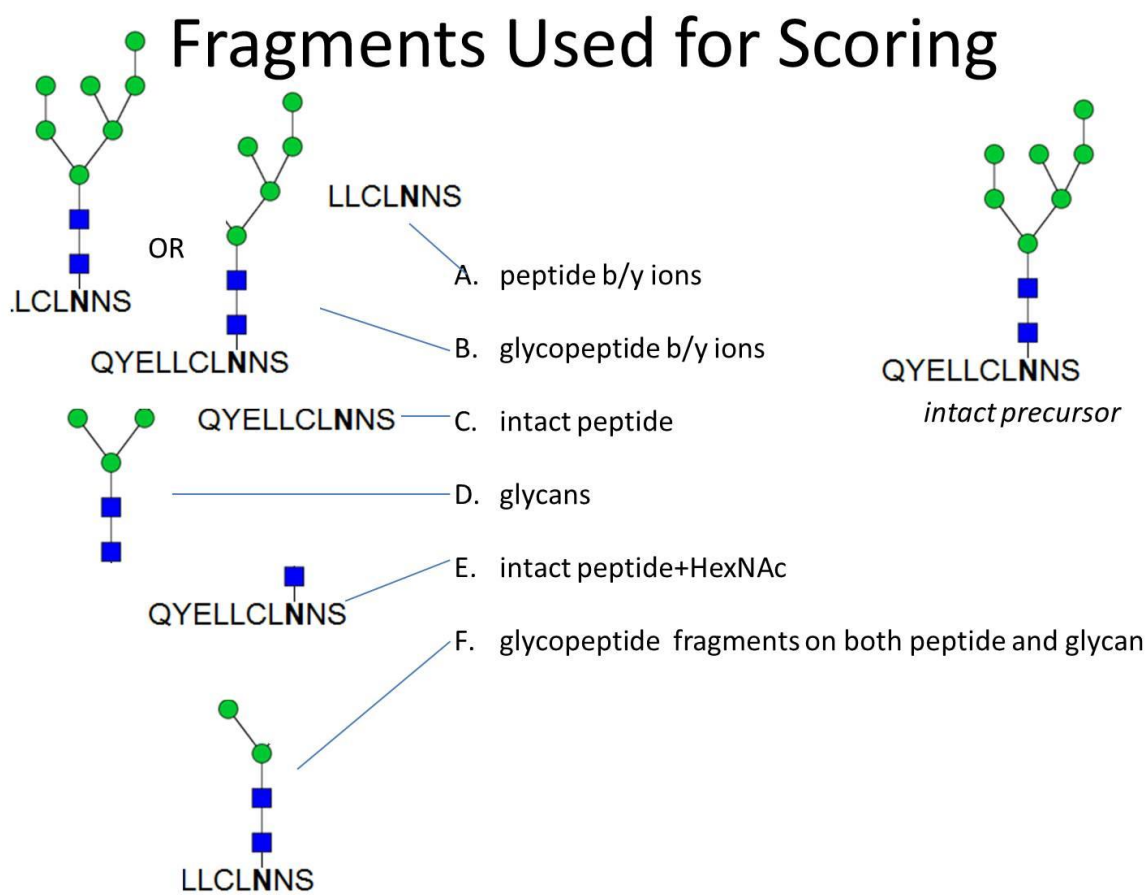

Figure S-26. Fragment types that are scored by GP Finder.



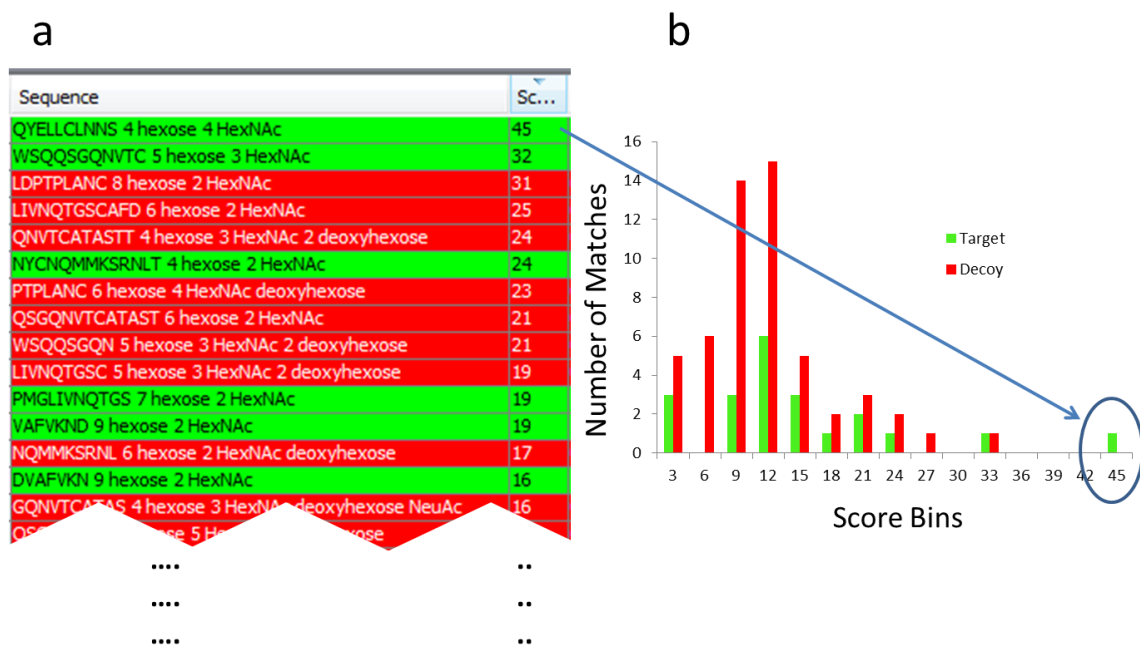

Figure S-27. Matching Scores to a Single Spectrum. The scores matching to a single tandem mass spectrum are shown here from one of the data points in Figure 1a. a. Abbreviated list of theoretical matches to a precursor mass. b. Histogram of all scores matching the precursor mass.

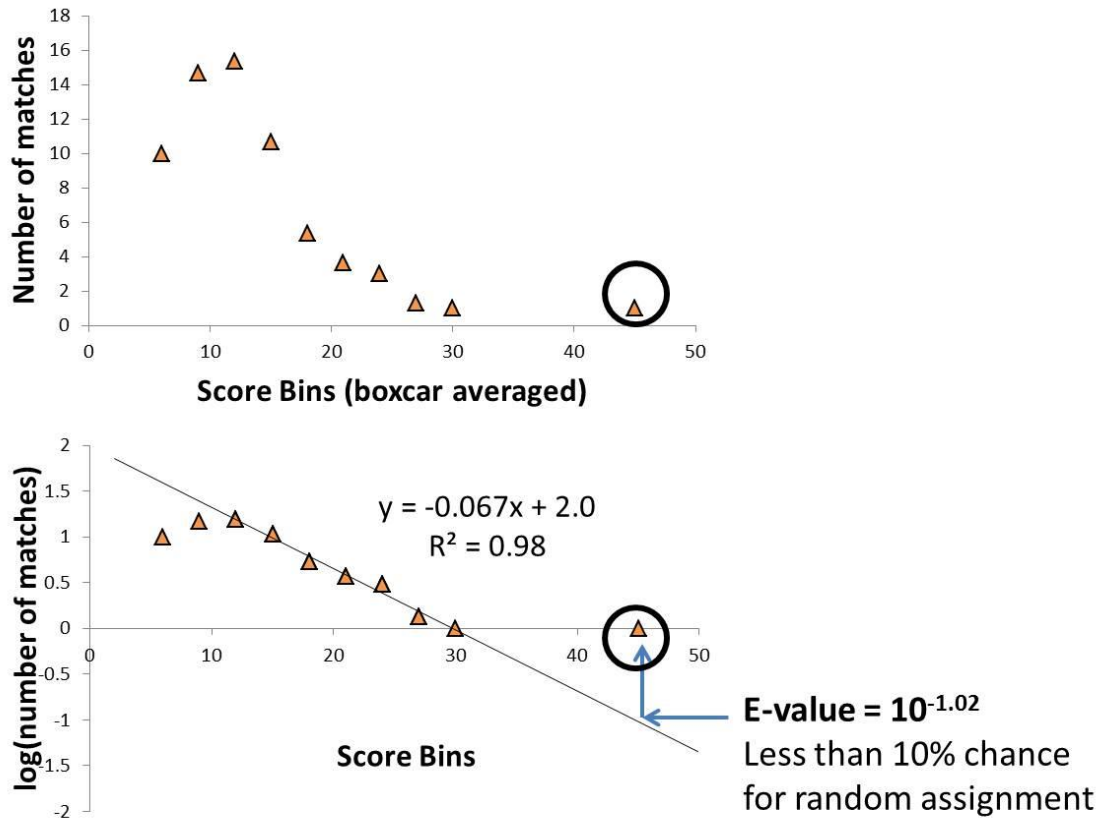

Figure S-28. E-value of Top Score. Demonstration of E-value calculation for the histogram in Figure S-27. a. Normal scale shows the exponentially decreasing tail. b. log-scale allows calculation of linear fit and prediction of the likelihood of observing a random match at the top score, i.e., the likelihood that the top scoring match for a particular spectrum is a part of the distribution of random matches.

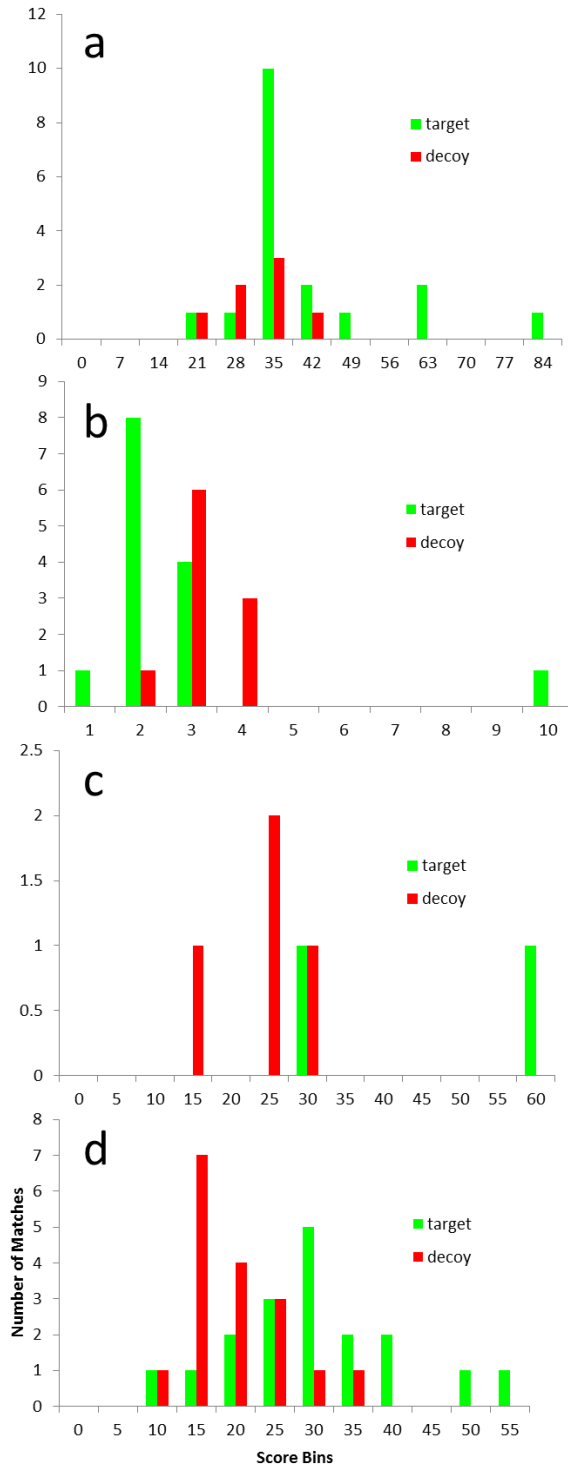

Figure S-29. Matches to Individual Spectra. Representative score distributions of the matches for four unrelated tandem spectra from four data points in Figure 1c. The top score was distinguished from the second highest score by the presence of P+PN and by a large peptide family with high-scoring members. Some top-assignments are ambiguous, as shown in d.

Table S-1. Self-Consistent Data. Self-consistency matches confirming a glycoform (Hex:HexNAc:2NeuAc) for CASK\_BOVIN on site 154.

| GP Mass    | Hex | HexNAc | NeuAc | Sequence    | RT       | Mass Error | Score |
|------------|-----|--------|-------|-------------|----------|------------|-------|
| 1652.62655 | 1   | 1      | 2     | STPTTEA     | 22.9725  | 7          | 74    |
| 1682.67515 | 1   | 1      | 2     | TSTPTTE     | 26.51533 | 11         | 75    |
| 1735.66495 | 1   | 1      | 2     | GEPTSTPT    | 30.6365  | 7          | 95    |
| 1822.69935 | 1   | 1      | 2     | SGEPTSTPT   | 24.28325 | 11         | 104   |
| 1880.73315 | 1   | 1      | 2     | STPTTEAVE   | 27.85567 | 16         | 76    |
| 1965.75615 | 1   | 1      | 2     | GEPTSTPTTE  | 27.59767 | 12         | 89    |
| 2052.78715 | 1   | 1      | 2     | SGEPTSTPTTE | 28.913   | 11         | 85    |

Table S-2. RNaseB Results. Theoretical glycopeptide matches to RNaseB digest data. The TDA-based FDR of 5% was calculated at a score threshold of 15. Manual analysis confirmed an actual 5% FDR at a score threshold of 20.

| GP Mass    | Hex | HexNAc | dHex | NeuAc | Peptide Site | Sequence | Retention Time | Protein site | Score | Family Count |
|------------|-----|--------|------|-------|--------------|----------|----------------|--------------|-------|--------------|
| 1504.57295 | 5   | 2      | 0    | 0     | 2            | RN       | 10.0025        | 60           | 46    | 11           |
| 1617.65675 | 5   | 2      | 0    | 0     | 2            | RNL      | 11.3930        | 60           | 45    | 11           |
| 1461.55475 | 5   | 2      | 0    | 0     | 1            | NL       | 10.7785        | 60           | 43    | 11           |
| 1779.70975 | 6   | 2      | 0    | 0     | 2            | RNL      | 10.6653        | 60           | 37    | 8            |
| 1348.47155 | 5   | 2      | 0    | 0     | 1            | N        | 9.5180         | 60           | 36    | 11           |
| 1718.70635 | 5   | 2      | 0    | 0     | 2            | RNLT     | 11.3773        | 60           | 36    | 11           |
| 1690.69855 | 5   | 2      | 0    | 0     | 1            | NLTK     | 9.6195         | 60           | 35    | 11           |
| 1666.62635 | 6   | 2      | 0    | 0     | 2            | RN       | 9.2120         | 60           | 35    | 8            |
| 2043.81475 | 6   | 3      | 1    | 0     | 3            | LAN      | 10.2550        | 99           | 35    | 2            |
| 1990.73335 | 8   | 2      | 0    | 0     | 2            | RN       | 9.2290         | 60           | 35    | 5            |
| 2048.76455 | 8   | 2      | 0    | 0     | 1            | NLT      | 9.8805         | 60           | 35    | 5            |
| 1617.65675 | 5   | 2      | 0    | 0     | 2            | RNL      | 11.6695        | 60           | 33    | 11           |
| 1947.71475 | 8   | 2      | 0    | 0     | 1            | NL       | 9.7625         | 60           | 33    | 5            |
| 1805.73555 | 5   | 2      | 0    | 0     | 3            | SRNLT    | 12.3975        | 60           | 32    | 11           |
| 1805.73555 | 5   | 2      | 0    | 0     | 1            | NLTKD    | 12.3975        | 60           | 32    | 11           |
| 1504.57295 | 5   | 2      | 0    | 0     | 2            | RN       | 10.2350        | 60           | 31    | 11           |
| 2103.81975 | 8   | 2      | 0    | 0     | 2            | RNL      | 10.5270        | 60           | 31    | 5            |
| 1724.65755 | 6   | 2      | 0    | 0     | 1            | NLT      | 9.9080         | 60           | 30    | 8            |
| 1852.74935 | 6   | 2      | 0    | 0     | 1            | NLTK     | 8.9415         | 60           | 30    | 8            |
| 1461.55475 | 5   | 2      | 0    | 0     | 1            | NL       | 11.0705        | 60           | 27    | 11           |
| 1562.60475 | 5   | 2      | 0    | 0     | 1            | NLT      | 10.7573        | 60           | 27    | 11           |
| 1510.52255 | 6   | 2      | 0    | 0     | 1            | N        | 8.6620         | 60           | 27    | 8            |
| 1828.68315 | 7   | 2      | 0    | 0     | 2            | RN       | 9.2520         | 60           | 27    | 6            |
| 1617.65675 | 5   | 2      | 0    | 0     | 2            | RNL      | 11.8640        | 60           | 26    | 11           |
| 1718.70635 | 5   | 2      | 0    | 0     | 2            | RNLT     | 11.6575        | 60           | 26    | 11           |
| 1880.75935 | 6   | 2      | 0    | 0     | 2            | RNLT     | 10.4377        | 60           | 26    | 8            |
| 1880.75935 | 6   | 2      | 0    | 0     | 2            | RNLT     | 10.6780        | 60           | 26    | 8            |
| 1880.75935 | 6   | 2      | 0    | 0     | 2            | RNLT     | 11.7600        | 60           | 26    | 8            |
| 1967.79215 | 6   | 2      | 0    | 0     | 3            | SRNLT    | 11.1775        | 60           | 25    | 8            |
| 1967.79215 | 6   | 2      | 0    | 0     | 1            | NLTKD    | 11.1775        | 60           | 25    | 8            |
| 2204.86855 | 8   | 2      | 0    | 0     | 2            | RNLT     | 10.4950        | 60           | 25    | 5            |

|             |   |   |   |   |    |               |         |     |    |    |
|-------------|---|---|---|---|----|---------------|---------|-----|----|----|
| 1591.61835  | 5 | 2 | 0 | 0 | 3  | SRN           | 16.1155 | 60  | 24 | 11 |
| 1704.69355  | 5 | 2 | 0 | 0 | 3  | SRNL          | 12.4580 | 60  | 24 | 11 |
| 1805.73555  | 5 | 2 | 0 | 0 | 3  | SRNLT         | 12.1265 | 60  | 24 | 11 |
| 1805.73555  | 5 | 2 | 0 | 0 | 1  | NLTKD         | 12.1265 | 60  | 24 | 11 |
| 1933.83775  | 5 | 2 | 0 | 0 | 3  | SRNLTK        | 11.6610 | 60  | 24 | 11 |
| 1933.83775  | 5 | 2 | 0 | 0 | 4  | KSRNLT        | 11.6610 | 60  | 24 | 11 |
| 1623.60875  | 6 | 2 | 0 | 0 | 1  | NL            | 9.8997  | 60  | 24 | 8  |
| 1666.62635  | 6 | 2 | 0 | 0 | 2  | RN            | 9.4150  | 60  | 24 | 8  |
| 2042.81535  | 7 | 2 | 0 | 0 | 2  | RNLT          | 10.5260 | 60  | 23 | 6  |
| 2210.82395  | 9 | 2 | 0 | 0 | 1  | NLT           | 9.6725  | 60  | 23 | 4  |
| 2366.91975  | 9 | 2 | 0 | 0 | 2  | RNLT          | 10.1710 | 60  | 23 | 4  |
| 2109.76595  | 9 | 2 | 0 | 0 | 1  | NL            | 9.6620  | 60  | 22 | 4  |
| 2338.91615  | 9 | 2 | 0 | 0 | 1  | NLTK          | 8.7500  | 60  | 22 | 4  |
| 2153.79315  | 4 | 5 | 0 | 0 | 1  | NDSR          | 9.0780  | 156 | 21 | 2  |
| 2042.81535  | 7 | 2 | 0 | 0 | 2  | RNLT          | 10.2500 | 60  | 21 | 6  |
| 2716.138425 | 3 | 3 | 0 | 0 | 12 | KCQQWSQQSGQNV | 35.3060 | 387 | 20 | 6  |
| 1692.648525 | 5 | 2 | 0 | 0 | 2  | KNDT          | 28.8880 | 564 | 20 | 4  |
| 1967.79215  | 6 | 2 | 0 | 0 | 3  | SRNLT         | 11.4535 | 60  | 20 | 8  |
| 1967.79215  | 6 | 2 | 0 | 0 | 1  | NLTKD         | 11.4535 | 60  | 20 | 8  |
| 2715.134025 | 5 | 2 | 0 | 0 | 1  | NCSVRQQTQHAVE | 35.0740 | 99  | 18 | 3  |
| 2014.80915  | 7 | 2 | 0 | 0 | 1  | NLTK          | 8.9975  | 60  | 16 | 6  |
| 1338.53655  | 3 | 2 | 0 | 0 | 2  | LNNS          | 20.8550 | 252 | 15 | 3  |
| 1552.66055  | 3 | 2 | 1 | 0 | 5  | TPLAN         | 19.9557 | 99  | 15 | 2  |
| 1746.686925 | 4 | 2 | 0 | 0 | 5  | AFVKND        | 33.4230 | 564 | 15 | 3  |
| 2270.92495  | 6 | 2 | 0 | 0 | 6  | VAFVKNDT      | 11.3645 | 564 | 15 | 3  |
| 2270.92495  | 6 | 2 | 0 | 0 | 5  | AFVKNDTV      | 11.3645 | 564 | 15 | 3  |
| 1672.57075  | 7 | 2 | 0 | 0 | 1  | N             | 8.8000  | 60  | 15 | 6  |
| 2292.90655  | 4 | 3 | 1 | 0 | 3  | LANCSVRQ      | 11.1290 | 99  | 14 | 7  |
| 1635.61775  | 5 | 2 | 0 | 0 | 3  | LANC          | 23.6590 | 99  | 14 | 3  |
| 2129.85355  | 7 | 2 | 0 | 0 | 3  | SRNLT         | 11.4380 | 60  | 14 | 6  |
| 2129.85355  | 7 | 2 | 0 | 0 | 1  | NLTKD         | 11.4380 | 60  | 14 | 6  |
| 1314.51215  | 4 | 2 | 0 | 0 | 2  | KN            | 14.4380 | 564 | 13 | 3  |
| 1548.58055  | 5 | 2 | 0 | 0 | 1  | NVT           | 23.2030 | 387 | 12 | 3  |
| 1353.56955  | 3 | 2 | 0 | 0 | 4  | LCLN          | 25.6150 | 252 | 11 | 3  |
| 1481.62155  | 3 | 2 | 0 | 0 | 3  | SRNLT         | 25.8120 | 60  | 11 | 5  |
| 1481.62155  | 3 | 2 | 0 | 0 | 1  | NLTKD         | 25.8120 | 60  | 11 | 5  |

|             |   |   |   |   |   |                   |         |     |    |   |
|-------------|---|---|---|---|---|-------------------|---------|-----|----|---|
| 1481.62155  | 3 | 2 | 0 | 0 | 3 | SRNLT             | 26.9700 | 60  | 11 | 5 |
| 1481.62155  | 3 | 2 | 0 | 0 | 1 | NLTKD             | 26.9700 | 60  | 11 | 5 |
| 1481.62155  | 3 | 2 | 0 | 0 | 3 | SRNLT             | 28.2160 | 60  | 11 | 5 |
| 1481.62155  | 3 | 2 | 0 | 0 | 1 | NLTKD             | 28.2160 | 60  | 11 | 5 |
| 1526.61595  | 3 | 2 | 0 | 0 | 5 | MKSRN             | 16.3080 | 60  | 11 | 5 |
| 1899.809325 | 3 | 2 | 0 | 0 | 8 | NQMMKSRN          | 27.0920 | 60  | 11 | 5 |
| 1606.61675  | 4 | 3 | 1 | 0 | 2 | AN                | 1.0930  | 99  | 11 | 7 |
| 1917.785925 | 4 | 3 | 1 | 0 | 5 | TPLAN             | 30.9640 | 99  | 11 | 7 |
| 1729.67055  | 3 | 2 | 1 | 0 | 3 | GQNVTC            | 27.0980 | 387 | 10 | 3 |
| 1930.85735  | 3 | 2 | 1 | 0 | 1 | NGSYLQLV          | 15.9340 | 176 | 10 | 3 |
| 2621.05915  | 3 | 2 | 1 | 0 | 7 | SQQSGQNVTCATASTT  | 25.5350 | 387 | 10 | 3 |
| 1412.51955  | 3 | 3 | 0 | 0 | 3 | GQN               | 7.0910  | 387 | 10 | 6 |
| 1729.67055  | 3 | 3 | 0 | 0 | 2 | QNVTC             | 27.0980 | 387 | 10 | 6 |
| 1719.60415  | 3 | 3 | 0 | 1 | 1 | NNS               | 7.3280  | 252 | 10 | 5 |
| 2623.02375  | 3 | 3 | 0 | 1 | 8 | WSQQSGQNVTC       | 26.4930 | 387 | 9  | 2 |
| 2331.977625 | 4 | 2 | 1 | 0 | 6 | ELLCLNNSRA        | 21.5830 | 252 | 9  | 2 |
| 1352.56455  | 3 | 2 | 0 | 0 | 2 | QNVTC             | 24.8870 | 387 | 8  | 3 |
| 1352.56455  | 3 | 2 | 0 | 0 | 2 | QNVTC             | 25.8010 | 387 | 8  | 3 |
| 1352.56455  | 3 | 2 | 0 | 0 | 2 | QNVTC             | 26.0775 | 387 | 8  | 3 |
| 1366.60735  | 3 | 2 | 0 | 0 | 1 | NLTK              | 41.4270 | 60  | 8  | 5 |
| 1368.49035  | 3 | 2 | 0 | 0 | 4 | AESNG             | 8.2560  | 176 | 8  | 2 |
| 3493.377525 | 3 | 5 | 0 | 1 | 5 | QSGQNVTCATASTTDDC | 33.6880 | 387 | 8  | 2 |
| 1311.51235  | 3 | 2 | 0 | 0 | 3 | LANC              | 24.2060 | 99  | 7  | 2 |
| 1848.77375  | 3 | 3 | 2 | 0 | 4 | LCLN              | 11.9690 | 252 | 7  | 3 |
| 2625.03275  | 3 | 4 | 2 | 0 | 6 | QQSGQNVTC         | 26.6340 | 387 | 7  | 4 |
| 1881.65715  | 4 | 3 | 0 | 1 | 1 | NNS               | 7.1970  | 252 | 7  | 3 |
| 1755.59855  | 5 | 2 | 1 | 0 | 2 | ANCS              | 23.1910 | 99  | 7  | 2 |
| 1788.749925 | 3 | 2 | 0 | 0 | 1 | NDSRVVHA          | 30.3790 | 156 | 6  | 4 |
| 1788.749925 | 3 | 2 | 0 | 0 | 1 | NDSRVVHA          | 31.3480 | 156 | 6  | 4 |
| 2183.00195  | 3 | 2 | 0 | 0 | 5 | LAPLNDSRVVHA      | 20.0505 | 156 | 6  | 4 |
| 1514.61555  | 3 | 2 | 1 | 0 | 2 | KNDT              | 28.2400 | 564 | 5  | 4 |
| 2157.925425 | 3 | 3 | 2 | 0 | 2 | LNNSRAP           | 19.4467 | 252 | 4  | 3 |
| 2740.183125 | 3 | 4 | 1 | 1 | 2 | RNLTKDRC          | 33.2190 | 60  | 4  | 2 |
| 1716.68175  | 4 | 2 | 0 | 0 | 4 | LCLNNS            | 17.4735 | 252 | 4  | 1 |
| 2184.00215  | 4 | 2 | 1 | 0 | 5 | LAPLNDSRV         | 19.8570 | 156 | 4  | 2 |
| 1527.60035  | 3 | 2 | 1 | 0 | 1 | NNSR              | 17.3445 | 252 | 3  | 1 |

|            |   |   |   |   |   |         |         |     |   |   |
|------------|---|---|---|---|---|---------|---------|-----|---|---|
| 1527.63455 | 3 | 2 | 1 | 0 | 1 | NNSR    | 16.4900 | 252 | 3 | 1 |
| 2181.00255 | 3 | 4 | 1 | 0 | 7 | PLLAPLN | 16.8660 | 156 | 3 | 1 |
| 2048.91895 | 4 | 2 | 1 | 0 | 5 | MKSRNLT | 39.7060 | 60  | 0 | 1 |



Table S-3. Protein Mixture Results. All N and O glycopeptide matches for CASK\_BOVIN, FETUA\_BOVIN, and TRFL\_BOVING that scored at 5% FDR, sorted by protein, site, and glycan. Red.=redundant with one or more other possible assignments at that site, NvO=conflicting protein assignments (mostly N v. O), neutral=neutral precursor mass, A.=amino acid number on peptide, RT=retention time in minutes, Site=protein glycosylation site, M.E.=mass error (ppm)

| Red,<br>NvO | m/z       | neutral   | Hex | HexNAc | dHex | NeuAc | Protein    | A. | RT       | Site | M.E. | Score | Sequence    |
|-------------|-----------|-----------|-----|--------|------|-------|------------|----|----------|------|------|-------|-------------|
|             | 772.8454  | 1543.6751 | 1   | 1      | 0    | 1     | CASK_BOVIN | 5  | 25.16475 | 142  | 15   | 101   | TEIPTINT    |
|             | 880.3832  | 1758.7507 | 1   | 1      | 0    | 1     | CASK_BOVIN | 1  | 27.07033 | 142  | 15   | 63    | TINTIASGEPT |
|             | 734.2918  | 1466.5679 | 2   | 2      | 1    | 0     | CASK_BOVIN | 4  | 28.40025 | 152  | 15   | 57    | GEPTST      |
|             | 531.2195  | 1060.4233 | 1   | 1      | 0    | 1     | CASK_BOVIN | 3  | 15.744   | 154  | 7    | 63    | TSTP        |
|             | 531.2195  | 1060.4233 | 1   | 1      | 0    | 1     | CASK_BOVIN | 3  | 14.43    | 154  | 7    | 58    | TSTP        |
|             | 646.2574  | 1290.4991 | 1   | 1      | 0    | 1     | CASK_BOVIN | 2  | 16.94967 | 154  | 15   | 79    | STPTTE      |
|             | 646.2574  | 1290.4991 | 1   | 1      | 0    | 1     | CASK_BOVIN | 2  | 16.488   | 154  | 15   | 62    | STPTTE      |
|             | 723.2941  | 1444.5725 | 1   | 1      | 0    | 1     | CASK_BOVIN | 6  | 19.8     | 154  | 15   | 70    | GEPTSTPT    |
| 0,1         | 723.2941  | 1444.5725 | 1   | 1      | 0    | 1     | CASK_BOVIN | 6  | 16.7725  | 154  | 15   | 69    | GEPTSTPT    |
|             | 827.3211  | 1652.6265 | 1   | 1      | 0    | 2     | CASK_BOVIN | 2  | 22.9725  | 154  | 7    | 74    | STPTTEA     |
|             | 842.3454  | 1682.6751 | 1   | 1      | 0    | 2     | CASK_BOVIN | 3  | 26.51533 | 154  | 7    | 75    | TSTPTTE     |
|             | 868.8403  | 1735.6649 | 1   | 1      | 0    | 2     | CASK_BOVIN | 6  | 30.6365  | 154  | 15   | 95    | GEPTSTPT    |
|             | 868.8403  | 1735.6649 | 1   | 1      | 0    | 2     | CASK_BOVIN | 6  | 31.3345  | 154  | 15   | 81    | GEPTSTPT    |
|             | 912.3575  | 1822.6993 | 1   | 1      | 0    | 2     | CASK_BOVIN | 7  | 24.28325 | 154  | 3    | 104   | SGEPTSTPT   |
|             | 912.3575  | 1822.6993 | 1   | 1      | 0    | 2     | CASK_BOVIN | 7  | 31.3545  | 154  | 3    | 92    | SGEPTSTPT   |
|             | 912.3575  | 1822.6993 | 1   | 1      | 0    | 2     | CASK_BOVIN | 7  | 32.247   | 154  | 3    | 86    | SGEPTSTPT   |
|             | 941.3744  | 1880.7331 | 1   | 1      | 0    | 2     | CASK_BOVIN | 2  | 27.85567 | 154  | 0    | 76    | STPTTEAVE   |
|             | 983.8859  | 1965.7561 | 1   | 1      | 0    | 2     | CASK_BOVIN | 6  | 27.59767 | 154  | 19   | 89    | GEPTSTPTTE  |
|             | 1027.4014 | 2052.7871 | 1   | 1      | 0    | 2     | CASK_BOVIN | 7  | 28.913   | 154  | 7    | 85    | SGEPTSTPTTE |
| 0,1         | 1006.8773 | 2011.7389 | 4   | 3      | 1    | 1     | CASK_BOVIN | 1  | 24.0215  | 154  | 15   | 76    | TPT         |
| 0,1         | 1089.9696 | 2177.9235 | 4   | 4      | 0    | 0     | CASK_BOVIN | 1  | 16.2945  | 154  | 15   | 57    | TPTTEAV     |
|             | 844.3572  | 1686.6987 | 2   | 2      | 1    | 1     | CASK_BOVIN | 2  | 20.9595  | 157  | 7    | 67    | TTEAV       |
| 0,1         | 1168.9292 | 2335.8427 | 4   | 3      | 3    | 1     | CASK_BOVIN | 2  | 23.34525 | 157  | 15   | 66    | TTE         |
| 0,1         | 1314.4767 | 2626.9377 | 4   | 3      | 3    | 2     | CASK_BOVIN | 2  | 26.01975 | 157  | 15   | 62    | TTE         |
|             | 422.1881  | 842.3605  | 1   | 1      | 0    | 0     | CASK_BOVIN | 2  | 9.786    | 163  | 15   | 55    | STVAT       |
|             | 517.2228  | 1032.4299 | 1   | 1      | 0    | 1     | CASK_BOVIN | 2  | 15.0435  | 163  | 7    | 58    | STVA        |
|             | 812.3502  | 1622.6847 | 1   | 1      | 0    | 2     | CASK_BOVIN | 5  | 24.47533 | 163  | 19   | 71    | AVESTVA     |
|             | 862.8593  | 1723.7029 | 1   | 1      | 0    | 2     | CASK_BOVIN | 5  | 24.9325  | 163  | 16   | 74    | AVESTVAT    |
| 0,1         | 1068.9363 | 2135.8569 | 4   | 4      | 0    | 0     | CASK_BOVIN | 5  | 14.796   | 163  | 19   | 57    | AVESTVA     |
| 0,1         | 1176.0044 | 2349.9931 | 4   | 4      | 0    | 0     | CASK_BOVIN | 5  | 16.618   | 163  | 19   | 69    | AVESTVATL   |

|     |           |           |   |   |   |   |             |   |          |     |    |    |               |
|-----|-----------|-----------|---|---|---|---|-------------|---|----------|-----|----|----|---------------|
|     | 567.7408  | 1133.4659 | 1 | 1 | 0 | 1 | CASK_BOVIN  | 1 | 13.1615  | 186 | 7  | 57 | TSTAV         |
|     | 696.3080  | 1390.6003 | 1 | 1 | 0 | 1 | CASK_BOVIN  | 5 | 16.603   | 186 | 7  | 67 | TVQVTST       |
|     | 841.8529  | 1681.6901 | 1 | 1 | 0 | 2 | CASK_BOVIN  | 5 | 24.70575 | 186 | 16 | 65 | TVQVTST       |
|     | 841.8529  | 1681.6901 | 1 | 1 | 0 | 2 | CASK_BOVIN  | 5 | 24.899   | 186 | 16 | 62 | TVQVTST       |
| 0,1 | 723.2941  | 1444.5725 | 3 | 3 | 1 | 0 | FETUA_BOVIN | 2 | 16.7725  | 99  | 12 | 40 | AN            |
| 0,1 | 1176.0044 | 2349.9931 | 4 | 4 | 0 | 0 | FETUA_BOVIN | 3 | 16.618   | 99  | 6  | 61 | LANCSVRQ      |
|     | 957.8650  | 1913.7143 | 5 | 3 | 0 | 1 | FETUA_BOVIN | 2 | 12.9935  | 99  | 12 | 45 | AN            |
|     | 721.2992  | 1440.5827 | 1 | 1 | 0 | 1 | FETUA_BOVIN | 4 | 21.87933 | 271 | 15 | 74 | EAPSAVPD      |
|     | 721.2992  | 1440.5827 | 1 | 1 | 0 | 1 | FETUA_BOVIN | 4 | 22.292   | 271 | 15 | 68 | EAPSAVPD      |
|     | 756.8139  | 1511.6121 | 1 | 1 | 0 | 1 | FETUA_BOVIN | 5 | 24.20833 | 271 | 19 | 62 | AEAPSAVPD     |
| 1,0 | 756.8139  | 1511.6121 | 1 | 1 | 0 | 1 | FETUA_BOVIN | 4 | 24.48    | 271 | 19 | 57 | EAPSAVPDA     |
| 1,0 | 756.8139  | 1511.6121 | 1 | 1 | 0 | 1 | FETUA_BOVIN | 5 | 24.48    | 271 | 19 | 57 | AEAPSAVPD     |
|     | 756.8228  | 1511.6299 | 1 | 1 | 0 | 1 | FETUA_BOVIN | 5 | 23.73125 | 271 | 19 | 79 | AEAPSAVPD     |
|     | 821.3357  | 1640.6557 | 1 | 1 | 0 | 1 | FETUA_BOVIN | 6 | 26.87325 | 271 | 15 | 80 | EAEAPSAVPD    |
|     | 939.3729  | 1876.7301 | 2 | 2 | 0 | 1 | FETUA_BOVIN | 5 | 27.34    | 271 | 15 | 74 | AEAPSAVPD     |
|     | 1057.4580 | 2112.9003 | 2 | 2 | 0 | 1 | FETUA_BOVIN | 5 | 21.51675 | 280 | 7  | 71 | AAGPTPSAAGPPV |
|     | 956.8727  | 1911.7297 | 2 | 2 | 0 | 2 | FETUA_BOVIN | 5 | 27.959   | 280 | 15 | 84 | AAGPTPS       |
| 1,0 | 956.8727  | 1911.7297 | 2 | 2 | 0 | 2 | FETUA_BOVIN | 1 | 28.1805  | 280 | 5  | 83 | TPSAAGP       |
| 1,0 | 956.8727  | 1911.7297 | 2 | 2 | 0 | 2 | FETUA_BOVIN | 4 | 28.1805  | 280 | 15 | 83 | AGPTPSA       |
| 1,0 | 956.8727  | 1911.7297 | 2 | 2 | 0 | 2 | FETUA_BOVIN | 5 | 28.1805  | 280 | 15 | 83 | AAGPTPS       |
| 0,1 | 992.3895  | 1982.7633 | 2 | 2 | 0 | 2 | FETUA_BOVIN | 5 | 28.04367 | 280 | 15 | 80 | AAGPTPSA      |
|     | 1153.4726 | 2304.9295 | 2 | 2 | 0 | 2 | FETUA_BOVIN | 5 | 28.59225 | 280 | 8  | 59 | AAGPTPSAAGPP  |
|     | 1203.0090 | 2404.0023 | 2 | 2 | 0 | 2 | FETUA_BOVIN | 5 | 33.60975 | 280 | 8  | 76 | AAGPTPSAAGPPV |
| 1,0 | 1203.0090 | 2404.0023 | 2 | 2 | 0 | 2 | FETUA_BOVIN | 4 | 32.982   | 280 | 13 | 66 | AGPTPSAAGPPVA |
| 1,0 | 1203.0090 | 2404.0023 | 2 | 2 | 0 | 2 | FETUA_BOVIN | 5 | 32.982   | 280 | 8  | 66 | AAGPTPSAAGPPV |
|     | 664.2791  | 1326.5425 | 1 | 1 | 0 | 1 | FETUA_BOVIN | 7 | 15.08567 | 282 | 19 | 60 | AAGPTPSA      |
|     | 774.3096  | 1546.6035 | 1 | 1 | 0 | 2 | FETUA_BOVIN | 7 | 20.56033 | 282 | 5  | 73 | AAGPTPS       |
|     | 774.3096  | 1546.6035 | 1 | 1 | 0 | 2 | FETUA_BOVIN | 7 | 20.765   | 282 | 5  | 66 | AAGPTPS       |
|     | 845.3450  | 1688.6743 | 1 | 1 | 0 | 2 | FETUA_BOVIN | 7 | 21.58667 | 282 | 15 | 67 | AAGPTPSAA     |
|     | 845.3450  | 1688.6743 | 1 | 1 | 0 | 2 | FETUA_BOVIN | 7 | 21.825   | 282 | 15 | 67 | AAGPTPSAA     |
|     | 765.3050  | 1528.5943 | 2 | 1 | 1 | 2 | FETUA_BOVIN | 2 | 17.29575 | 282 | 5  | 55 | PSA           |
| 1,0 | 888.9302  | 1775.8447 | 1 | 1 | 0 | 1 | FETUA_BOVIN | 3 | 31.871   | 341 | 16 | 62 | QPSIPGGPVRL   |
| 1,0 | 888.9302  | 1775.8447 | 1 | 1 | 0 | 1 | FETUA_BOVIN | 6 | 31.871   | 341 | 3  | 62 | IVGQPSIPGGPV  |
|     | 888.9302  | 1775.8447 | 1 | 1 | 0 | 1 | FETUA_BOVIN | 6 | 31.56033 | 341 | 3  | 61 | IVGQPSIPGGPV  |
|     | 937.8315  | 1873.6473 | 7 | 2 | 0 | 0 | TRFL_BOVIN  | 1 | 11.938   | 252 | 11 | 74 | NNS           |
|     | 945.3354  | 1888.6551 | 7 | 2 | 0 | 0 | TRFL_BOVIN  | 3 | 12.603   | 252 | 19 | 58 | CLN           |

|     |           |           |   |   |   |   |            |   |          |     |    |     |        |
|-----|-----------|-----------|---|---|---|---|------------|---|----------|-----|----|-----|--------|
|     | 975.3637  | 1948.7117 | 8 | 2 | 0 | 0 | TRFL_BOVIN | 1 | 11.592   | 252 | 19 | 64  | NN     |
|     | 1018.8616 | 2035.7075 | 8 | 2 | 0 | 0 | TRFL_BOVIN | 1 | 11.69267 | 252 | 19 | 79  | NNS    |
|     | 1026.3601 | 2050.7045 | 8 | 2 | 0 | 0 | TRFL_BOVIN | 3 | 12.3875  | 252 | 19 | 76  | CLN    |
|     | 1026.3601 | 2050.7045 | 8 | 2 | 0 | 0 | TRFL_BOVIN | 3 | 12.5865  | 252 | 19 | 68  | CLN    |
|     | 1075.4034 | 2148.7911 | 8 | 2 | 0 | 0 | TRFL_BOVIN | 2 | 12.822   | 252 | 6  | 51  | LNNS   |
|     | 1096.9115 | 2191.8073 | 8 | 2 | 0 | 0 | TRFL_BOVIN | 1 | 11.606   | 252 | 6  | 42  | NNSR   |
|     | 1056.3737 | 2110.7317 | 9 | 2 | 0 | 0 | TRFL_BOVIN | 1 | 11.682   | 252 | 18 | 81  | NN     |
|     | 1099.8884 | 2197.7611 | 9 | 2 | 0 | 0 | TRFL_BOVIN | 1 | 11.773   | 252 | 18 | 91  | NNS    |
|     | 1107.3908 | 2212.7659 | 9 | 2 | 0 | 0 | TRFL_BOVIN | 3 | 12.241   | 252 | 18 | 104 | CLN    |
|     | 1156.4272 | 2310.8387 | 9 | 2 | 0 | 0 | TRFL_BOVIN | 2 | 12.857   | 252 | 8  | 102 | LNNS   |
|     | 1177.9353 | 2353.8549 | 9 | 2 | 0 | 0 | TRFL_BOVIN | 1 | 11.64733 | 252 | 6  | 83  | NNSR   |
|     | 775.3002  | 1548.5847 | 5 | 2 | 0 | 0 | TRFL_BOVIN | 1 | 13.482   | 387 | 19 | 70  | NVT    |
|     | 811.3010  | 1620.5863 | 5 | 2 | 0 | 0 | TRFL_BOVIN | 4 | 13.3295  | 387 | 12 | 64  | SGQN   |
|     | 860.8346  | 1719.6535 | 5 | 2 | 0 | 0 | TRFL_BOVIN | 4 | 14.952   | 387 | 18 | 51  | SGQNV  |
|     | 892.3286  | 1782.6415 | 6 | 2 | 0 | 0 | TRFL_BOVIN | 4 | 13.613   | 387 | 12 | 44  | SGQN   |
|     | 941.8587  | 1881.7017 | 6 | 2 | 0 | 0 | TRFL_BOVIN | 4 | 13.94675 | 387 | 12 | 72  | SGQNV  |
|     | 937.3508  | 1872.6859 | 7 | 2 | 0 | 0 | TRFL_BOVIN | 1 | 12.519   | 387 | 18 | 73  | NVT    |
|     | 973.3502  | 1944.6847 | 7 | 2 | 0 | 0 | TRFL_BOVIN | 4 | 12.527   | 387 | 12 | 58  | SGQN   |
|     | 1022.8848 | 2043.7539 | 7 | 2 | 0 | 0 | TRFL_BOVIN | 4 | 13.6585  | 387 | 8  | 68  | SGQNV  |
|     | 1022.8848 | 2043.7539 | 7 | 2 | 0 | 0 | TRFL_BOVIN | 4 | 14.002   | 387 | 8  | 49  | SGQNV  |
|     | 1073.4095 | 2144.8033 | 7 | 2 | 0 | 0 | TRFL_BOVIN | 4 | 14.068   | 387 | 6  | 45  | SGQNV  |
|     | 967.8510  | 1933.6863 | 8 | 2 | 0 | 0 | TRFL_BOVIN | 1 | 12.247   | 387 | 18 | 61  | NV     |
|     | 967.8510  | 1933.6863 | 8 | 2 | 0 | 0 | TRFL_BOVIN | 1 | 12.675   | 387 | 18 | 49  | NV     |
|     | 1018.3784 | 2034.7411 | 8 | 2 | 0 | 0 | TRFL_BOVIN | 1 | 12.61733 | 387 | 8  | 79  | NVT    |
|     | 1054.3737 | 2106.7317 | 8 | 2 | 0 | 0 | TRFL_BOVIN | 4 | 12.313   | 387 | 18 | 46  | SGQN   |
|     | 1054.3737 | 2106.7317 | 8 | 2 | 0 | 0 | TRFL_BOVIN | 4 | 12.626   | 387 | 18 | 46  | SGQN   |
|     | 1103.9115 | 2205.8073 | 8 | 2 | 0 | 0 | TRFL_BOVIN | 4 | 13.784   | 387 | 12 | 64  | SGQNV  |
|     | 1048.8828 | 2095.7499 | 9 | 2 | 0 | 0 | TRFL_BOVIN | 1 | 12.255   | 387 | 8  | 66  | NV     |
|     | 1135.3984 | 2268.7811 | 9 | 2 | 0 | 0 | TRFL_BOVIN | 4 | 12.354   | 387 | 18 | 60  | SGQN   |
|     | 1184.9384 | 2367.8611 | 9 | 2 | 0 | 0 | TRFL_BOVIN | 4 | 13.545   | 387 | 4  | 60  | SGQNV  |
| 0,1 | 1006.8773 | 2011.7389 | 4 | 3 | 1 | 0 | TRFL_BOVIN | 1 | 24.0215  | 495 | 6  | 55  | NQTGSC |
|     | 911.8471  | 1821.6785 | 4 | 4 | 0 | 0 | TRFL_BOVIN | 1 | 11.9045  | 495 | 18 | 48  | NQT    |
|     | 988.4189  | 1974.8221 | 4 | 4 | 0 | 0 | TRFL_BOVIN | 5 | 15.61267 | 495 | 18 | 60  | GLIVN  |
|     | 1023.9377 | 2045.8597 | 4 | 4 | 0 | 0 | TRFL_BOVIN | 4 | 15.613   | 495 | 8  | 64  | LIVNQ  |
|     | 1052.4550 | 2102.8943 | 4 | 4 | 0 | 0 | TRFL_BOVIN | 5 | 16.371   | 495 | 18 | 50  | GLIVNQ |
|     | 1074.4626 | 2146.9095 | 4 | 4 | 0 | 0 | TRFL_BOVIN | 4 | 15.89467 | 495 | 10 | 46  | LIVNQT |

|     |  |           |           |   |   |   |   |            |   |          |     |    |    |         |
|-----|--|-----------|-----------|---|---|---|---|------------|---|----------|-----|----|----|---------|
|     |  | 1102.9757 | 2203.9357 | 4 | 4 | 0 | 0 | TRFL_BOVIN | 5 | 16.421   | 495 | 8  | 67 | GLIVNQT |
| 0,1 |  | 1068.9363 | 2135.8569 | 4 | 5 | 0 | 0 | TRFL_BOVIN | 3 | 14.796   | 495 | 2  | 67 | IVNQ    |
| 0,1 |  | 1089.9696 | 2177.9235 | 4 | 5 | 0 | 0 | TRFL_BOVIN | 5 | 16.2945  | 495 | 5  | 74 | GLIVN   |
|     |  | 1119.4611 | 2236.9065 | 4 | 5 | 0 | 0 | TRFL_BOVIN | 3 | 14.87767 | 495 | 1  | 53 | IVNQT   |
|     |  | 1125.4766 | 2248.9375 | 4 | 5 | 0 | 0 | TRFL_BOVIN | 4 | 16.4515  | 495 | 10 | 41 | LIVNQ   |
|     |  | 1155.4881 | 2308.9605 | 4 | 5 | 0 | 0 | TRFL_BOVIN | 6 | 16.17833 | 495 | 14 | 40 | MGLIVN  |
|     |  | 1155.4881 | 2308.9605 | 4 | 5 | 0 | 0 | TRFL_BOVIN | 6 | 16.678   | 495 | 14 | 40 | MGLIVN  |
| 1,0 |  | 1204.5116 | 2407.0075 | 4 | 5 | 0 | 0 | TRFL_BOVIN | 4 | 17.042   | 495 | 14 | 47 | LIVNQTG |
| 1,0 |  | 1204.5116 | 2407.0075 | 4 | 5 | 0 | 0 | TRFL_BOVIN | 5 | 17.042   | 495 | 6  | 47 | GLIVNQT |
|     |  | 845.3478  | 1688.6799 | 5 | 2 | 0 | 0 | TRFL_BOVIN | 3 | 15.8145  | 495 | 18 | 72 | IVNQ    |
|     |  | 866.3683  | 1730.7209 | 5 | 2 | 0 | 0 | TRFL_BOVIN | 5 | 17.455   | 495 | 19 | 80 | GLIVN   |
|     |  | 901.8887  | 1801.7617 | 5 | 2 | 0 | 0 | TRFL_BOVIN | 4 | 17.673   | 495 | 19 | 48 | LIVNQ   |
|     |  | 930.4006  | 1858.7855 | 5 | 2 | 0 | 0 | TRFL_BOVIN | 5 | 18.27475 | 495 | 19 | 74 | GLIVNQ  |
|     |  | 952.4100  | 1902.8043 | 5 | 2 | 0 | 0 | TRFL_BOVIN | 4 | 17.79375 | 495 | 18 | 55 | LIVNQT  |
| 1,0 |  | 980.9229  | 1959.8301 | 5 | 2 | 0 | 0 | TRFL_BOVIN | 4 | 18.415   | 495 | 18 | 46 | LIVNQTG |
| 1,0 |  | 980.9229  | 1959.8301 | 5 | 2 | 0 | 0 | TRFL_BOVIN | 5 | 18.415   | 495 | 10 | 46 | GLIVNQT |
|     |  | 946.8855  | 1891.7553 | 5 | 3 | 0 | 0 | TRFL_BOVIN | 3 | 14.33    | 495 | 6  | 42 | IVNQ    |
|     |  | 1033.4191 | 2064.8225 | 5 | 3 | 0 | 0 | TRFL_BOVIN | 6 | 18.218   | 495 | 0  | 45 | MGLIVN  |
|     |  | 1053.9506 | 2105.8855 | 5 | 3 | 0 | 0 | TRFL_BOVIN | 4 | 16.029   | 495 | 17 | 45 | LIVNQT  |
|     |  | 1082.4617 | 2162.9077 | 5 | 3 | 0 | 0 | TRFL_BOVIN | 5 | 16.5685  | 495 | 17 | 66 | GLIVNQT |
|     |  | 805.8037  | 1609.5917 | 6 | 2 | 0 | 0 | TRFL_BOVIN | 2 | 12.62    | 495 | 19 | 70 | VN      |
|     |  | 870.8206  | 1739.6255 | 6 | 2 | 0 | 0 | TRFL_BOVIN | 1 | 13.3035  | 495 | 12 | 72 | NQT     |
|     |  | 920.3583  | 1838.7009 | 6 | 2 | 0 | 0 | TRFL_BOVIN | 2 | 14.301   | 495 | 18 | 60 | VNQT    |
|     |  | 926.3737  | 1850.7317 | 6 | 2 | 0 | 0 | TRFL_BOVIN | 3 | 16.21725 | 495 | 5  | 87 | IVNQ    |
|     |  | 947.3943  | 1892.7729 | 6 | 2 | 0 | 0 | TRFL_BOVIN | 5 | 17.99    | 495 | 12 | 48 | GLIVN   |
|     |  | 976.9021  | 1951.7885 | 6 | 2 | 0 | 0 | TRFL_BOVIN | 3 | 16.35833 | 495 | 18 | 54 | IVNQT   |
|     |  | 982.9104  | 1963.8051 | 6 | 2 | 0 | 0 | TRFL_BOVIN | 4 | 18.1035  | 495 | 18 | 80 | LIVNQ   |
|     |  | 992.3805  | 1982.7453 | 6 | 2 | 0 | 0 | TRFL_BOVIN | 2 | 13.937   | 495 | 6  | 58 | VNQTGS  |
|     |  | 992.3805  | 1982.7453 | 6 | 2 | 0 | 0 | TRFL_BOVIN | 2 | 15.347   | 495 | 6  | 51 | VNQTGS  |
| 0,1 |  | 992.3895  | 1982.7633 | 6 | 2 | 0 | 0 | TRFL_BOVIN | 2 | 28.04367 | 495 | 6  | 47 | VNQTGS  |
|     |  | 1011.4250 | 2020.8343 | 6 | 2 | 0 | 0 | TRFL_BOVIN | 5 | 18.73325 | 495 | 18 | 74 | GLIVNQ  |
|     |  | 1033.4377 | 2064.8597 | 6 | 2 | 0 | 0 | TRFL_BOVIN | 4 | 18.26875 | 495 | 6  | 66 | LIVNQT  |
| 1,0 |  | 1061.9412 | 2121.8667 | 6 | 2 | 0 | 0 | TRFL_BOVIN | 4 | 18.823   | 495 | 17 | 46 | LIVNQTG |
| 1,0 |  | 1061.9412 | 2121.8667 | 6 | 2 | 0 | 0 | TRFL_BOVIN | 5 | 18.823   | 495 | 4  | 46 | GLIVNQT |
| 1,0 |  | 1061.9478 | 2121.8799 | 6 | 2 | 0 | 0 | TRFL_BOVIN | 4 | 18.9165  | 495 | 8  | 70 | LIVNQTG |
| 1,0 |  | 1061.9478 | 2121.8799 | 6 | 2 | 0 | 0 | TRFL_BOVIN | 5 | 18.9165  | 495 | 6  | 70 | GLIVNQT |

|     |           |           |   |   |   |   |            |   |          |     |    |    |         |
|-----|-----------|-----------|---|---|---|---|------------|---|----------|-----|----|----|---------|
|     | 1061.9478 | 2121.8799 | 6 | 2 | 0 | 0 | TRFL_BOVIN | 5 | 16.774   | 495 | 6  | 57 | GLIVNQT |
|     | 945.3325  | 1888.6493 | 7 | 2 | 0 | 0 | TRFL_BOVIN | 1 | 12.5355  | 564 | 19 | 65 | NDT     |
|     | 1087.9048 | 2173.7939 | 7 | 2 | 0 | 0 | TRFL_BOVIN | 1 | 23.535   | 564 | 6  | 54 | NDTVW   |
|     | 1087.9048 | 2173.7939 | 7 | 2 | 0 | 0 | TRFL_BOVIN | 1 | 23.87775 | 564 | 6  | 46 | NDTVW   |
| 0,1 | 1168.9292 | 2335.8427 | 8 | 2 | 0 | 0 | TRFL_BOVIN | 1 | 23.34525 | 564 | 6  | 78 | NDTVW   |
|     | 1233.4439 | 2464.8721 | 8 | 2 | 0 | 0 | TRFL_BOVIN | 1 | 26.5625  | 564 | 0  | 40 | NDTVWE  |
|     | 1156.9196 | 2311.8235 | 9 | 2 | 0 | 0 | TRFL_BOVIN | 1 | 12.894   | 564 | 4  | 54 | NDTV    |
|     | 1249.9580 | 2497.9003 | 9 | 2 | 0 | 0 | TRFL_BOVIN | 1 | 23.23275 | 564 | 6  | 83 | NDTVW   |
| 0,1 | 1314.4767 | 2626.9377 | 9 | 2 | 0 | 0 | TRFL_BOVIN | 1 | 26.01975 | 564 | 6  | 56 | NDTVWE  |

Table S-4. Protein Mixture Summary. Comprehensive SSG for bovine lactoferrin, fetuin, and kappa casein with TDA-compliant results above 5% FDR. Three sites did not contain matches above the 5% FDR threshold.

| Protein            | Site | Type | Glycans | Glycopeptides |
|--------------------|------|------|---------|---------------|
| Bovine Lactoferrin | 252  | N    | 3       | 12            |
|                    | 300  | N    |         |               |
|                    | 387  | N    | 5       | 17            |
|                    | 495  | N    | 6       | 37            |
|                    | 564  | N    | 3       | 7             |
| Bovine Fetuin      | 99   | N    | 3       | 3             |
|                    | 156  | N    |         |               |
|                    | 176  | N    |         |               |
|                    | 271  | O    | 2       | 6             |
|                    | 280  | O    | 2       | 7             |
|                    | 282  | O    | 3       | 5             |
|                    | 341  | O    | 1       | 2             |
| Kappa Casein       | 142  | O    | 1       | 2             |
|                    | 152  | O    | 1       | 1             |
|                    | 154  | O    | 4       | 12            |
|                    | 157  | O    | 3       | 3             |
|                    | 163  | O    | 4       | 6             |
|                    | 186  | O    | 2       | 3             |

Table S-5. Increased Top Score Distinction. Top five target matches for precursor mass 2310.8388 Da. The top scoring match was substantially more separated from all other matches after applying the self-consistency algorithm.

| Score                |                                       | Peptide | Hex | HexNAc | dHex | NeuAc | Protein |
|----------------------|---------------------------------------|---------|-----|--------|------|-------|---------|
| w/o self-consistency | w/self-consistency and TDA-compliance |         |     |        |      |       |         |
| 56                   | 102                                   | LNNS    | 9   | 2      | 0    | 0     | BLF     |
| 44                   | 59                                    | NQTGSC  | 8   | 2      | 0    | 0     | BLF     |
| 35                   | 44                                    | CLNN    | 8   | 2      | 1    | 0     | BLF     |
| 22                   | 28                                    | SNGSY   | 6   | 3      | 0    | 0     | BF      |
| 18                   | 22                                    | NDTVWE  | 4   | 3      | 0    | 1     | BLF     |
